# Supplementary material for: Identification of Climate-Smart Bread Wheat Germplasm Lines With Enhanced Adaptation to Global Warming
Source: Preprints.org preprint supplement (doi:10.20944/preprints202305.2192.v1), 2023-05-31
Supplement: Supplementary file 1 [file supplementary]

**Supplementary Table S1** | Details of bread wheat accessions used in the study along with their IC/EC (Indigenous/Exotic Collection) number, alternate identity and original source of acquisition.

| Sl. No. | Accession Number | Alternate id         | Original Source         | Year of Release/Collection | Parentage                         | Remarks                                                      | Recommended for cultivation (ecology and zone)  |
|---------|------------------|----------------------|-------------------------|----------------------------|-----------------------------------|--------------------------------------------------------------|-------------------------------------------------|
| 1.      | IC443766         | RAJ3765              | RARI, Jaipur, Rajasthan | 1996                       | HD 2402/VL639                     | Tolerance to terminal heat-stress                            | Irrigated, late sown conditions of CZ           |
| 2.      | IC519900         | HD2932               | IARI, New Delhi         | 2008                       | KAUZ/STAR//HD 2643                | Brown rust resistance and high zinc content                  | Irrigated, late sown conditions of CZ           |
| 3.      | IC296383         | WR544 (Pusa Gold)    | IARI, New Delhi         | 2005                       | KALYANSONA/HD 1999//HD2204/DW38   | Very early maturing, resistance to brown rust                | Irrigated, late/very late sown, for Delhi state |
| 4.      | IC574476         | HD2967               | IARI, New Delhi         | 2011                       | ALD/COC//URES/HD2160M/HD2278      | Wider adaptability and resistance to yellow and brown rust   | Irrigated, timely sown conditions of NWPZ       |
| 5.      | EC574731         | 8832                 | CIMMYT, Mexico          | -                          | -                                 | Germplasm line                                               | -                                               |
| 6.      | EC576707         | E4828                | CIMMYT, Mexico          | -                          | -                                 | Elite line/germplasm                                         | -                                               |
| 7.      | IC252725         | HUW467               | BHU, Varanasi           | 1999                       | -                                 | Germplasm collection                                         | Irrigated, Timely sown, NEPZ                    |
| 8.      | IC252816         | KRL13                | IIWBR, Karnal           | 1999                       | -                                 | Germplasm line with salinity tolerance                       | -                                               |
| 9.      | IC277741         | Dharwad 680          | Dharwad, Karnataka      | 2000                       | -                                 | Germplasm collection                                         | -                                               |
| 10.     | IC536081         | WL3226               | PAU, Ludhiana           | -                          | -                                 | Germplasm line                                               | -                                               |
| 11.     | IC279617         | KHH416               | Tehri, Uttarakhand      | 2000                       | -                                 | Germplasm collection (Safed Gehun)                           | -                                               |
| 12.     | IC535176         | WON-D14              | IARI, New Delhi         | -                          | -                                 | Germplasm line                                               | -                                               |
| 13.     | IC401976         | PHR1011              | IIWBR, Karnal           | -                          | -                                 | Germplasm line with High protein (>13%) and high TGW (>40 g) | -                                               |
| 14.     | IC539221         | EIGN-I-(04-05)/149   | IIWBR, Karnal           | 2005                       | -                                 | Germplasm collection                                         | -                                               |
| 15.     | IC539287         | MC2003-71            | IIWBR, Karnal           | -                          | -                                 | Germplasm line                                               | -                                               |
| 16.     | IC539531         | EIGN1 (03-04)/112    | IIWBR, Karnal           | -                          | -                                 | Germplasm line                                               | -                                               |
| 17.     | IC443661         | PHR1017              | IIWBR, Karnal           | -                          | -                                 | Germplasm line                                               | -                                               |
| 18.     | EC534487         | VEE/KOEL (PAU351)    | USDA, USA               | -                          | -                                 | Germplasm line                                               | -                                               |
| 19.     | IC416018         | PAU438 (W 7484)      | PAU, Ludhiana           | -                          | -                                 | Germplasm line                                               | -                                               |
| 20.     | IC416075         | PAU495 (W 8067)      | PAU, Ludhiana           | -                          | -                                 | Germplasm line                                               | -                                               |
| 21.     | IC416078         | PAU498 (W 8093)      | PAU, Ludhiana           | -                          | -                                 | Germplasm line                                               | -                                               |
| 22.     | IC416019         | PAU439 (W 7485)      | PAU, Ludhiana           | -                          | -                                 | Germplasm line                                               | -                                               |
| 23.     | IC446713         | PSR11489 (Godhumalu) | Nizamabad, Telangana    | -                          | -                                 | Germplasm line                                               | -                                               |
| 24.     | IC075240         | C306                 | CCSHAU, Hisar           | 1969                       | RGN/CSK3//2*C591/3/C217/N14//C281 | Good for <i>chapatti</i> making quality                      | Rainfed, timely sown conditions of NWPZ         |
| 25.     | EC178071         | NA                   | CIMMYT, Mexico          | -                          | -                                 | Germplasm line                                               | -                                               |
| 26.     | IC542509         | PAU1453              | PAU, Ludhiana           | -                          | -                                 | Germplasm line                                               | -                                               |
| 27.     | IC252348         | AKW2294              | PDKV, Akola             | -                          | -                                 | Germplasm line                                               | -                                               |
| 28.     | IC543293         | PAU1218              | PAU, Ludhiana           | -                          | -                                 | Germplasm line                                               | -                                               |
| 29.     | IC128454         | HB602                | Bhowali, Uttarakhand    | -                          | -                                 | Germplasm line                                               | -                                               |
| 30.     | IC416055         | PAU475 (W 7883)      | PAU, Ludhiana           | -                          | -                                 | Germplasm line                                               | -                                               |

|     |          |                       |                           |      |                                    |                                                                          |                                                  |
|-----|----------|-----------------------|---------------------------|------|------------------------------------|--------------------------------------------------------------------------|--------------------------------------------------|
| 31. | IC111800 | J1-7                  | JAU, Junagadh             | 1975 | Selection from J1                  | Pink colour auricle and dark brown ear colour                            | Restricted irrigation, timely sown for CZ        |
| 32. | IC111931 | K101 (Kundan)         | CSUAT, Kanpur             | 1969 | HYBRID65/<br>HYBRID 1-1            | -                                                                        | Irrigated, timely/late sown, NEPZ                |
| 33. | EC576317 | E1804                 | CIMMYT, Mexico            | -    | -                                  | Elite line/germplasm                                                     | -                                                |
| 34. | EC577013 | E8826                 | CIMMYT, Mexico            | -    | -                                  | Elite line/germplasm                                                     | -                                                |
| 35. | EC414149 | CHNQIRR 95S OCHN      | CIMMYT, Mexico            | -    | -                                  | Elite line/germplasm                                                     | -                                                |
| 36. | IC252653 | HI1433                | IARI RS, Indore           | 1999 | -                                  | Elite germplasm                                                          | -                                                |
| 37. | IC252739 | HW1058                | Wellington, TN            | -    | -                                  | Elite germplasm                                                          | -                                                |
| 38. | IC335792 | KAUZ+ 1B.1R           | IIWBR, Karnal             | -    | -                                  | Germplasm line                                                           | -                                                |
| 39. | IC543425 | 10TH HTW YT38         | IARI, New Delhi           | -    | -                                  | Elite line for heat tolerance                                            | -                                                |
| 40. | IC402055 | K20008 (KRL35)        | IIWBR, Karnal             | 2004 | -                                  | Elite germplasm                                                          | -                                                |
| 41. | IC265318 | NKD2671               | Sawai Madhopur, Rajasthan | -    | -                                  | Germplasm collection (Katha Gehun)                                       | -                                                |
| 42. | IC445449 | ET99745               | IIWBR, Karnal             | -    | -                                  | Germplasm line                                                           | -                                                |
| 43. | IC528965 | VFW182                | VPKAS, Almora             | -    | -                                  | Germplasm line                                                           | -                                                |
| 44. | IC549437 | PHR1032               | IIWBR, Karnal             | -    | -                                  | Germplasm line                                                           | -                                                |
| 45. | IC144911 | VW120 (GW120)         | RARS, Vijapur Gujarat     | 1985 | INIA66/CNO//INI6 6/BB/3/Y50E/3*KAL | -                                                                        | Irrigated, late sown conditions of NWPZ          |
| 46. | IC542578 | PAU558                | PAU, Ludhiana             | -    | -                                  | Germplasm line                                                           | -                                                |
| 47. | IC535704 | PBW124                | PAU, Ludhiana             | -    | -                                  | Elite germplasm                                                          | -                                                |
| 48. | EC542533 | NA*                   | USDA, USA                 | -    | -                                  | Elite germplasm                                                          | -                                                |
| 49. | IC542652 | PAU4061               | PAU, Ludhiana             | -    | -                                  | Germplasm line (Brochis susceptible)                                     | -                                                |
| 50. | IC536468 | K8415                 | CSUAT, Kanpur             | -    | -                                  | Germplasm line                                                           | -                                                |
| 51. | IC536483 | CPAN2039              | IIWBR, Karnal             | -    | -                                  | Germplasm line                                                           | -                                                |
| 52. | EC574735 | 8842                  | CIMMYT, Mexico            | -    | -                                  | Germplasm line                                                           | -                                                |
| 53. | IC531191 | PBW103                | PAU, Ludhiana             | -    | -                                  | Elite germplasm                                                          | -                                                |
| 54. | IC333095 | NKD/YS R2910          | Barwani, MP               | -    | -                                  | Germplasm line (DL-803)                                                  | -                                                |
| 55. | IC572925 | HPW185                | Malan, Kangra (HP)        | 2009 | -                                  | Germplasm collection                                                     | -                                                |
| 56. | IC252867 | NW1014                | NDUAT, Ayodhya            | 1998 | HAHN 'S'                           | High resistance against all the three rusts, leaf blight and Karnal bunt | Irrigated, late sown conditions of NEPZ          |
| 57. | IC524299 | HW2012                | IARI RS, Wellington       | -    | -                                  | Elite germplasm                                                          | -                                                |
| 58. | IC573461 | GW11 (GW396)          | RARS, Vijapur, Gujarat    | 2013 | LOK1/HW 1042// LOK1                | High WUE variety and resistance to brown and black rusts                 | Gujarat state                                    |
| 59. | IC252444 | BW/SH49               | Kolkata, WB               | 1999 | -                                  | Germplasm collection                                                     | -                                                |
| 60. | IC529207 | VFW2150               | VPKAS, Almora             | 2005 | -                                  | Germplasm collection                                                     | -                                                |
| 61. | IC290191 | HW971                 | Wellington, TN            | 2000 | -                                  | Germplasm collection                                                     | -                                                |
| 62. | IC112258 | VL401                 | VPKAS, Almora             | 1978 | FKN/N 10B                          | -                                                                        | Timely sown, rain-fed for U.P. hills             |
| 63. | IC627711 | CAZ/JSM/ AP/01        | Jaisalmer, Rajasthan      | 2018 | -                                  | Registered germplasm for conserved moisture                              | Cultivated in conserved moisture of Khading Raj. |
| 64. | IC443653 | HD2851 (Pusa Vishesh) | IARI, New Delhi           | 2005 | CPAN3004/WR426 // HW 2007          | Resistance to yellow, brown and black rusts                              | Timely sown, irrigated for Delhi state           |
| 65. | IC252431 | BW/SH30               | Kolkata, WB               | -    | -                                  | Germplasm line                                                           | -                                                |
| 66. | IC252619 | HD2590                | IARI, New Delhi           | 1999 | -                                  | Elite germplasm                                                          | -                                                |

|     |          |                         |                        |      |                             |                                                                     |                                           |
|-----|----------|-------------------------|------------------------|------|-----------------------------|---------------------------------------------------------------------|-------------------------------------------|
| 67. | IC529242 | VFW1290                 | VPKAS, Almora          | 2005 | -                           | Germplasm collection                                                | -                                         |
| 68. | IC536162 | WL4996                  | PAU, Ludhiana          | -    | -                           | Germplasm line                                                      | -                                         |
| 69. | IC536050 | WL1803                  | PAU, Ludhiana          | -    | -                           | Germplasm line                                                      | -                                         |
| 70. | IC252999 | WH594                   | CCSHAU, Hisar          | 1999 | -                           | Germplasm collection                                                | -                                         |
| 71. | IC443640 | DWR240                  | IIWBR, Karnal          | 2004 | -                           | Germplasm line with early maturity                                  | -                                         |
| 72. | IC445365 | 7 <sup>th</sup> EGPSN78 | IIWBR, Karnal          | 2004 | -                           | Elite line                                                          | -                                         |
| 73. | IC303071 | RAJ3777                 | RARI, Jaipur           | 2006 | RAJ3160/HD2449              | Tolerance to terminal heat-stress                                   | Late sown, Irrigated/ Rainfed for HP      |
| 74. | IC252414 | BW1050                  | Kolkata, WB            | 1999 | -                           | Germplasm collection                                                | -                                         |
| 75. | IC372643 | KRR/AK7                 | Mandi, HP              | 2002 | -                           | Germplasm collection (Kanak)                                        | -                                         |
| 76. | IC252620 | HD2615                  | IARI, New Delhi        | 1999 | -                           | Germplasm line                                                      | -                                         |
| 77. | IC240818 | GW273                   | RARS, Vijapur, Gujarat | 1998 | CPAN 2084/VW205             | Field resistance to brown and black rusts, high sedimentation value | Irrigated, timely sown conditions of CZ   |
| 78. | IC401940 | K8962 (Indra)           | CSUAT, Kanpur          | 1996 | K7401/HD 2160               | Tolerance to brown and black rust                                   | Rainfed, late sown conditions of NEPZ     |
| 79. | IC443694 | PBW527                  | PAU, Ludhiana          | 2008 | PBW 175/PBW389              | Resistance to yellow and brown rust                                 | Timely sown, rain-fed for Punjab state    |
| 80. | IC542547 | PAU4091                 | PAU, Ludhiana          | -    | -                           | Germplasm line                                                      | -                                         |
| 81. | EC190962 | Cultivar No.30          | CIMMYT, Mexico         | -    | -                           | Elite line/germplasm                                                | -                                         |
| 82. | EC576066 | 410                     | CIMMYT, Mexico         | -    | -                           | Elite line/germplasm                                                | -                                         |
| 83. | EC573527 | 3850                    | CIMMYT, Mexico         | -    | -                           | Elite line/germplasm                                                | -                                         |
| 84. | EC576585 | E3228                   | CIMMYT, Mexico         | -    | -                           | Elite line/germplasm                                                | -                                         |
| 85. | EC190899 | Cultivar No.37          | CIMMYT, Mexico         | -    | -                           | Elite germplasm                                                     | -                                         |
| 86. | EC574849 | 9008                    | CIMMYT, Mexico         | -    | -                           | Elite line/germplasm                                                | -                                         |
| 87. | EC576175 | E10906                  | CIMMYT, Mexico         | -    | -                           | Elite line/germplasm                                                | -                                         |
| 88. | IC582706 | HPW240                  | Malan, Kangra (HP)     | 2009 | -                           | Germplasm collection (Gehun Kanak)                                  | -                                         |
| 89. | IC393878 | WH157                   | CCSHAU, Hisar          | 1978 | NP876/S308/CNO /8156        | For saline/alkaline soil                                            | Irrigated, timely sown conditions of NWPZ |
| 90. | IC542544 | PAU4088                 | PAU, Ludhiana          | -    | -                           | Germplasm collection                                                | -                                         |
| 91. | IC566223 | HS492                   | IARI RS, Shimla        | 2008 | HPW42/CPAN2032/ UNATH K.S.  | -                                                                   | -                                         |
| 92. | IC342668 | VKG21/72                | Chatra, Jharkhand      | 2002 | -                           | Germplasm collection                                                | -                                         |
| 93. | IC535717 | PBW139                  | PAU, Ludhiana          | -    | -                           | Germplasm collection                                                | -                                         |
| 94. | IC553599 | HI1544 (Purna)          | IARI RS, Indore        | 2008 | HINDI62/BOBWHI TE/CPAN 2099 | Early maturing, field resistance to brown and black rusts           | Irrigated, timely sown conditions of CZ   |
| 95. | EC277134 | 713                     | CIMMYT, Mexico         | -    | -                           | Elite line/germplasm                                                | -                                         |
| 96. | NA       | CUO/79/ Pru 11A         | CIMMYT, Mexico         | -    | -                           | Elite line/germplasm                                                | -                                         |

\*NA-Not available; **BHU**-Banaras Hindu University, Varanasi, Uttar Pradesh; **CIMMYT**-International Maize and Wheat Improvement Center, Mexico; **CSUAT**-Chandra Shekhar Azad University of Agriculture and Technology, Kanpur, Uttar Pradesh; **CCSHAU**- CCS Haryana Agricultural University, Hisar, Haryana; **IARI**-Indian Agriculture Research Institute, New Delhi; **IARI RS**: IARI Regional station; **IIWBR**-Indian Institute of Wheat and Barley Research, Karnal, Haryana; **JAU**: Junagadh Agricultural University, Junagadh, Gujarat; **NDUAT**-Acharya Narendra Deva University of Agriculture and Technology, Ayodhya, Uttar Pradesh; **PAU**-Punjab Agricultural University, Ludhiana, Punjab; **PDKV**-Panjabaro Deshmukh Krishi Vidyapeeth, Akola, Maharashtra; **RARI**-Rajasthan Agricultural Research Institute, Jaipur, Rajasthan; **RARS**: Regional Agricultural Research Station, Vijapur, Gujarat; **USDA**-United States Department of Agriculture, USA; **VPKAS**-Vivekananda Parvatiya Krishi Anusandhan Sansthan, Almora, Uttarakhand; **HP**: Himachal Pradesh; **TN**: Tamil Nadu; **WB**: West Bengal.
