# Supplementary material for: Identification of Climate-Smart Bread Wheat Germplasm Lines With Enhanced Adaptation to Global Warming
Source: Preprints.org preprint supplement (doi:10.20944/preprints202305.2192.v1), 2023-05-31
Supplement: Supplementary file 2 [file supplementary]

**Supplementary Table S4** | Combined adjusted mean values for 18 morpho-physiological and yield contributing traits recorded in 96 accessions of bread wheat over two years 2018-19 and 2019-20 under heat-stressed environment.

| Sl. No | Accession | CC   | CTD (°C) | NDVI  | MSI (%) | PW  | LR   | DA (days) | GFP (days) | PH (cm) | PL (cm) | FLA (cm <sup>2</sup> ) | SL (cm) | NSS  | GL (mm) | GW (mm) | TGW (g) | HI (%) | GY (g/m <sup>2</sup> ) |
|--------|-----------|------|----------|-------|---------|-----|------|-----------|------------|---------|---------|------------------------|---------|------|---------|---------|---------|--------|------------------------|
| 1      | Raj3765   | 21.2 | 7.1      | 0.470 | 63.5    | 6.6 | 5.4  | 74.4      | 28.6       | 91.9    | 33.4    | 30.4                   | 10.9    | 18.8 | 7.15    | 3.34    | 38.7    | 36.7   | 472.0                  |
| 2      | HD2932    | 24.0 | 7.0      | 0.491 | 62.5    | 8.5 | 7.9  | 74.1      | 28.9       | 90.0    | 31.9    | 19.9                   | 10.6    | 19.7 | 6.39    | 3.43    | 36.6    | 38.5   | 458.8                  |
| 3      | WR544     | 25.3 | 6.7      | 0.404 | 60.0    | 6.0 | 5.2  | 66.6      | 30.7       | 101.3   | 41.0    | 33.4                   | 10.7    | 18.9 | 6.61    | 3.44    | 37.7    | 41.8   | 472.1                  |
| 4      | HD2967    | 34.0 | 8.0      | 0.558 | 66.3    | 8.0 | 6.4  | 76.8      | 28.8       | 90.8    | 31.3    | 25.1                   | 10.0    | 19.8 | 6.30    | 3.43    | 36.2    | 35.7   | 518.7                  |
| 5      | EC574731  | 24.2 | 6.5      | 0.549 | 47.2    | 7.0 | 7.0  | 79.0      | 24.5       | 97.5    | 33.0    | 31.8                   | 9.9     | 17.5 | 6.94    | 3.32    | 37.6    | 33.1   | 500.7                  |
| 6      | EC576707  | 20.3 | 8.0      | 0.452 | 48.0    | 7.0 | 5.0  | 73.5      | 29.0       | 118.2   | 44.9    | 21.6                   | 10.8    | 18.9 | 6.38    | 3.18    | 32.4    | 28.9   | 534.7                  |
| 7      | IC252725  | 21.3 | 7.2      | 0.517 | 55.4    | 7.0 | 7.0  | 72.0      | 32.0       | 92.2    | 34.9    | 20.5                   | 11.7    | 16.7 | 6.58    | 3.42    | 39.1    | 36.1   | 459.4                  |
| 8      | IC252816  | 15.5 | 7.8      | 0.492 | 61.4    | 6.0 | 4.0  | 76.0      | 29.0       | 124.9   | 41.3    | 21.2                   | 10.1    | 17.7 | 7.13    | 3.24    | 36.4    | 29.8   | 431.4                  |
| 9      | IC277741  | 17.6 | 8.4      | 0.565 | 58.3    | 6.0 | 4.0  | 77.5      | 29.5       | 113.4   | 39.2    | 21.3                   | 12.4    | 20.7 | 6.92    | 3.30    | 35.8    | 38.5   | 416.1                  |
| 10     | IC536081  | 22.1 | 8.6      | 0.458 | 53.0    | 8.0 | 6.0  | 75.5      | 26.5       | 103.7   | 39.6    | 24.3                   | 11.4    | 18.9 | 6.62    | 3.30    | 35.1    | 34.5   | 316.1                  |
| 11     | IC279617  | 24.7 | 8.7      | 0.474 | 48.7    | 8.0 | 7.0  | 74.0      | 29.5       | 89.4    | 33.6    | 21.8                   | 10.7    | 19.5 | 6.56    | 3.31    | 33.7    | 40.8   | 420.1                  |
| 12     | IC535176  | 23.3 | 9.0      | 0.509 | 50.4    | 6.0 | 6.0  | 73.5      | 30.0       | 112.2   | 53.8    | 29.7                   | 11.5    | 19.5 | 6.95    | 3.55    | 45.0    | 39.0   | 532.1                  |
| 13     | IC401976  | 28.6 | 8.3      | 0.519 | 52.0    | 8.0 | 6.0  | 75.5      | 30.5       | 91.0    | 37.5    | 45.7                   | 12.9    | 22.7 | 7.34    | 3.64    | 45.2    | 37.9   | 478.1                  |
| 14     | IC539221  | 26.1 | 10.2     | 0.538 | 45.7    | 2.0 | 5.0  | 74.0      | 29.0       | 121.4   | 43.9    | 32.5                   | 13.5    | 20.5 | 6.89    | 3.43    | 46.6    | 35.3   | 468.7                  |
| 15     | IC539287  | 19.9 | 10.0     | 0.472 | 53.1    | 4.0 | 6.0  | 73.0      | 24.5       | 108.2   | 40.8    | 19.5                   | 8.5     | 19.7 | 8.62    | 2.64    | 36.2    | 27.0   | 176.7                  |
| 16     | IC539531  | 26.0 | 9.4      | 0.473 | 59.3    | 8.0 | 6.0  | 70.5      | 31.5       | 85.4    | 35.4    | 27.0                   | 11.0    | 20.9 | 6.76    | 3.48    | 42.6    | 39.7   | 452.1                  |
| 17     | IC443661  | 24.5 | 10.7     | 0.532 | 49.3    | 6.0 | 7.0  | 80.5      | 29.0       | 89.7    | 33.4    | 28.0                   | 13.4    | 20.9 | 6.55    | 3.51    | 39.2    | 33.8   | 413.4                  |
| 18     | EC534487  | 23.2 | 10.9     | 0.494 | 58.7    | 8.0 | 7.0  | 76.5      | 29.0       | 94.0    | 31.1    | 20.1                   | 11.1    | 20.7 | 6.65    | 3.32    | 37.6    | 37.6   | 496.1                  |
| 19     | IC416018  | 20.7 | 8.6      | 0.473 | 55.0    | 7.0 | 9.0  | 73.0      | 29.0       | 87.4    | 28.1    | 14.4                   | 11.5    | 17.0 | 7.28    | 3.25    | 37.6    | 37.2   | 508.1                  |
| 20     | IC416075  | 21.9 | 6.2      | 0.382 | 50.3    | 7.0 | 6.0  | 69.5      | 31.0       | 80.0    | 31.9    | 25.6                   | 8.6     | 17.9 | 7.11    | 3.43    | 41.9    | 33.8   | 458.1                  |
| 21     | IC416078  | 26.2 | 5.7      | 0.405 | 49.6    | 7.0 | 8.0  | 76.0      | 27.0       | 79.7    | 27.0    | 19.7                   | 11.0    | 21.9 | 6.47    | 3.16    | 29.9    | 35.1   | 462.1                  |
| 22     | IC416019  | 17.2 | 7.2      | 0.440 | 59.6    | 7.0 | 10.0 | 74.5      | 27.5       | 84.7    | 28.3    | 17.1                   | 9.4     | 16.9 | 7.08    | 3.30    | 36.8    | 39.9   | 490.1                  |
| 23     | IC446713  | 23.5 | 9.2      | 0.505 | 49.8    | 5.0 | 5.0  | 74.0      | 29.0       | 124.5   | 45.1    | 25.8                   | 9.4     | 16.5 | 6.47    | 3.09    | 41.7    | 37.4   | 505.4                  |
| 24     | IC075240  | 23.9 | 9.0      | 0.569 | 50.3    | 6.0 | 5.0  | 75.5      | 28.0       | 125.4   | 46.5    | 25.9                   | 9.3     | 17.4 | 6.82    | 3.19    | 39.9    | 33.8   | 460.1                  |

|    |          |      |      |       |      |      |      |      |      |       |      |      |      |      |      |      |      |      |       |
|----|----------|------|------|-------|------|------|------|------|------|-------|------|------|------|------|------|------|------|------|-------|
| 25 | EC178071 | 26.7 | 7.9  | 0.520 | 61.5 | 7.0  | 6.0  | 77.0 | 26.5 | 96.0  | 37.0 | 28.8 | 11.7 | 19.2 | 6.93 | 3.01 | 45.5 | 38.4 | 454.1 |
| 26 | IC542509 | 26.0 | 12.0 | 0.642 | 67.5 | 8.0  | 5.0  | 94.0 | 24.0 | 103.7 | 31.8 | 51.7 | 12.0 | 18.5 | 6.73 | 2.88 | 26.2 | 23.4 | 287.4 |
| 27 | IC252348 | 26.8 | 9.8  | 0.507 | 61.0 | 8.0  | 5.0  | 75.5 | 27.0 | 110.0 | 38.4 | 29.8 | 12.6 | 18.7 | 7.03 | 3.27 | 41.9 | 36.6 | 476.7 |
| 28 | IC543293 | 22.2 | 9.3  | 0.524 | 56.8 | 8.0  | 5.0  | 81.0 | 26.0 | 88.4  | 29.0 | 21.7 | 10.4 | 20.5 | 6.12 | 3.28 | 31.8 | 25.2 | 341.4 |
| 29 | IC128454 | 30.0 | 8.9  | 0.479 | 54.8 | 8.0  | 6.0  | 78.5 | 24.0 | 92.5  | 31.9 | 30.5 | 10.8 | 20.0 | 6.41 | 3.02 | 29.1 | 33.1 | 538.1 |
| 30 | IC416055 | 18.8 | 8.3  | 0.483 | 60.6 | 9.0  | 10.0 | 74.5 | 28.0 | 92.7  | 32.5 | 14.3 | 10.0 | 18.0 | 6.16 | 3.13 | 29.0 | 38.4 | 418.7 |
| 31 | IC111800 | 26.1 | 7.2  | 0.412 | 62.9 | 8.0  | 7.0  | 74.0 | 28.0 | 90.2  | 30.0 | 17.2 | 10.6 | 19.0 | 6.52 | 3.10 | 31.1 | 29.0 | 452.1 |
| 32 | IC111931 | 17.2 | 7.1  | 0.390 | 59.2 | 7.0  | 6.0  | 75.5 | 27.5 | 89.7  | 35.8 | 28.9 | 10.9 | 18.5 | 6.60 | 3.27 | 31.6 | 28.8 | 347.4 |
| 33 | EC576317 | 14.2 | 7.7  | 0.470 | 60.4 | 6.0  | 5.0  | 70.0 | 27.5 | 115.7 | 48.1 | 19.4 | 9.2  | 15.5 | 6.25 | 3.38 | 38.2 | 28.5 | 303.4 |
| 34 | EC577013 | 18.9 | 7.7  | 0.545 | 62.8 | 6.0  | 5.0  | 82.0 | 23.5 | 125.0 | 46.1 | 24.5 | 9.8  | 17.7 | 5.85 | 3.22 | 28.9 | 25.0 | 242.1 |
| 35 | EC414149 | 30.1 | 6.1  | 0.460 | 46.1 | 8.0  | 6.0  | 75.0 | 25.0 | 80.7  | 30.7 | 30.6 | 8.1  | 18.9 | 6.54 | 3.68 | 42.5 | 30.0 | 298.1 |
| 36 | IC252653 | 24.0 | 6.3  | 0.482 | 55.9 | 8.0  | 7.0  | 74.0 | 26.5 | 99.2  | 38.1 | 18.0 | 11.0 | 17.7 | 6.23 | 3.18 | 28.5 | 38.3 | 481.4 |
| 37 | IC252739 | 27.2 | 4.9  | 0.447 | 54.9 | 7.0  | 6.0  | 74.5 | 26.0 | 93.0  | 34.4 | 21.0 | 10.6 | 20.0 | 6.60 | 3.35 | 31.5 | 34.9 | 386.7 |
| 38 | IC335792 | 19.8 | 6.3  | 0.479 | 59.7 | 8.0  | 8.0  | 73.5 | 28.0 | 80.7  | 29.9 | 14.2 | 9.3  | 18.0 | 6.17 | 3.03 | 29.9 | 38.9 | 539.4 |
| 39 | IC543425 | 24.0 | 6.9  | 0.505 | 59.7 | 9.0  | 9.0  | 73.5 | 29.0 | 92.2  | 32.6 | 18.0 | 10.4 | 19.9 | 5.99 | 3.23 | 31.9 | 33.7 | 498.0 |
| 40 | IC402055 | 21.5 | 6.4  | 0.542 | 55.0 | 3.0  | 4.0  | 73.0 | 29.5 | 116.5 | 35.5 | 23.2 | 10.5 | 18.5 | 7.06 | 3.37 | 40.9 | 35.5 | 328.7 |
| 41 | IC265318 | 22.0 | 6.5  | 0.512 | 49.6 | 8.0  | 8.0  | 72.5 | 30.5 | 90.5  | 32.5 | 24.6 | 10.3 | 18.0 | 6.65 | 3.35 | 36.4 | 38.0 | 504.1 |
| 42 | IC445449 | 20.6 | 6.9  | 0.600 | 55.0 | 6.0  | 9.0  | 83.0 | 25.0 | 91.7  | 32.5 | 24.3 | 11.8 | 20.2 | 6.37 | 3.10 | 29.0 | 28.2 | 343.4 |
| 43 | IC528965 | 26.0 | 5.7  | 0.562 | 64.2 | 10.0 | 8.0  | 77.5 | 27.5 | 111.9 | 38.5 | 25.7 | 11.1 | 20.0 | 6.80 | 3.12 | 34.8 | 32.0 | 408.7 |
| 44 | IC549437 | 20.2 | 6.6  | 0.632 | 48.5 | 2.0  | 7.0  | 79.5 | 27.0 | 85.0  | 27.5 | 15.7 | 11.5 | 17.0 | 7.07 | 3.27 | 36.3 | 29.0 | 333.4 |
| 45 | IC144911 | 20.8 | 5.9  | 0.467 | 53.2 | 9.0  | 7.0  | 73.5 | 29.5 | 97.9  | 37.9 | 18.2 | 10.6 | 19.4 | 6.34 | 3.28 | 31.1 | 36.1 | 425.4 |
| 46 | IC542578 | 17.0 | 6.1  | 0.480 | 61.2 | 7.0  | 7.0  | 75.0 | 26.5 | 95.7  | 32.8 | 18.6 | 10.2 | 17.9 | 6.72 | 3.27 | 35.5 | 37.0 | 474.1 |
| 47 | IC535704 | 20.5 | 5.5  | 0.468 | 60.7 | 7.0  | 7.0  | 70.0 | 30.0 | 89.0  | 36.5 | 19.9 | 9.9  | 17.5 | 6.45 | 3.38 | 36.6 | 38.4 | 434.7 |
| 48 | EC542533 | 20.9 | 5.5  | 0.488 | 64.3 | 5.0  | 6.0  | 76.0 | 27.0 | 95.3  | 32.9 | 25.0 | 11.1 | 18.2 | 6.26 | 3.14 | 28.3 | 33.6 | 419.4 |
| 49 | IC542652 | 20.3 | 5.8  | 0.485 | 62.1 | 7.0  | 6.0  | 76.0 | 28.5 | 88.2  | 30.9 | 23.9 | 9.8  | 17.9 | 6.45 | 3.21 | 33.1 | 30.1 | 418.1 |
| 50 | IC536468 | 23.8 | 5.3  | 0.474 | 62.1 | 6.0  | 7.0  | 73.5 | 29.0 | 100.8 | 36.4 | 21.4 | 9.9  | 19.5 | 6.46 | 3.48 | 38.0 | 42.0 | 435.4 |
| 51 | IC536483 | 25.0 | 6.4  | 0.525 | 72.0 | 8.0  | 7.0  | 76.5 | 27.5 | 90.7  | 31.3 | 28.0 | 10.3 | 19.9 | 6.04 | 3.30 | 32.7 | 38.0 | 394.7 |
| 52 | EC574735 | 19.2 | 6.4  | 0.555 | 69.9 | 4.0  | 8.0  | 77.0 | 28.5 | 93.5  | 36.6 | 21.4 | 9.7  | 16.5 | 6.29 | 3.23 | 31.0 | 33.5 | 458.7 |

|    |          |      |     |       |      |      |     |      |      |       |      |      |      |      |      |      |      |      |       |
|----|----------|------|-----|-------|------|------|-----|------|------|-------|------|------|------|------|------|------|------|------|-------|
| 53 | IC531191 | 19.9 | 5.4 | 0.514 | 67.6 | 7.0  | 8.0 | 75.0 | 29.5 | 85.5  | 29.3 | 23.5 | 11.0 | 19.0 | 6.55 | 3.05 | 28.9 | 31.9 | 390.7 |
| 54 | IC333095 | 24.9 | 6.1 | 0.529 | 66.8 | 8.0  | 7.0 | 74.0 | 27.5 | 90.9  | 35.5 | 20.1 | 11.1 | 20.0 | 6.40 | 3.58 | 33.4 | 45.0 | 430.1 |
| 55 | IC572925 | 20.4 | 5.2 | 0.404 | 57.6 | 6.0  | 5.0 | 69.5 | 30.0 | 93.4  | 33.5 | 24.6 | 9.6  | 16.7 | 6.92 | 3.40 | 35.8 | 39.2 | 446.1 |
| 56 | IC252867 | 24.2 | 4.7 | 0.407 | 43.7 | 8.0  | 7.0 | 69.0 | 29.0 | 104.7 | 37.1 | 22.9 | 10.8 | 17.7 | 6.83 | 3.28 | 38.6 | 39.8 | 438.7 |
| 57 | IC524299 | 25.7 | 5.1 | 0.474 | 70.6 | 7.0  | 7.0 | 72.5 | 29.0 | 95.7  | 28.5 | 19.8 | 10.8 | 19.5 | 6.83 | 3.10 | 34.1 | 35.8 | 422.7 |
| 58 | IC573461 | 27.8 | 4.8 | 0.480 | 59.2 | 6.0  | 6.0 | 75.0 | 29.5 | 94.2  | 31.3 | 21.9 | 10.3 | 16.7 | 6.97 | 3.23 | 31.1 | 30.2 | 462.7 |
| 59 | IC252444 | 37.2 | 4.4 | 0.570 | 59.5 | 2.0  | 7.0 | 76.0 | 25.5 | 93.4  | 28.0 | 23.9 | 11.1 | 18.0 | 7.04 | 2.78 | 34.4 | 25.6 | 294.1 |
| 60 | IC529207 | 32.1 | 6.2 | 0.549 | 63.2 | 10.0 | 8.0 | 80.5 | 26.5 | 99.2  | 30.2 | 31.7 | 12.1 | 21.0 | 6.40 | 3.32 | 35.7 | 33.6 | 527.4 |
| 61 | IC290191 | 25.5 | 5.9 | 0.438 | 60.2 | 5.0  | 6.0 | 73.0 | 25.5 | 106.2 | 43.7 | 26.6 | 12.1 | 19.0 | 6.65 | 3.28 | 34.5 | 35.6 | 482.7 |
| 62 | IC112258 | 20.9 | 7.2 | 0.464 | 61.0 | 7.0  | 7.0 | 78.5 | 24.5 | 102.4 | 32.2 | 24.5 | 11.9 | 20.4 | 6.91 | 2.75 | 30.0 | 30.2 | 424.7 |
| 63 | IC627711 | 19.7 | 6.9 | 0.475 | 59.4 | 5.0  | 4.0 | 73.0 | 28.5 | 125.5 | 46.8 | 29.2 | 10.7 | 17.5 | 7.29 | 3.37 | 41.3 | 33.4 | 440.7 |
| 64 | IC443653 | 20.7 | 6.5 | 0.410 | 60.2 | 7.0  | 5.0 | 69.5 | 31.0 | 73.2  | 30.7 | 23.8 | 9.4  | 16.5 | 6.72 | 3.47 | 33.3 | 48.0 | 417.4 |
| 65 | IC252431 | 30.6 | 8.2 | 0.510 | 59.1 | 2.0  | 7.0 | 77.5 | 26.5 | 87.2  | 30.6 | 24.2 | 9.9  | 18.5 | 6.50 | 3.24 | 33.0 | 30.8 | 478.4 |
| 66 | IC252619 | 22.8 | 6.8 | 0.445 | 66.2 | 7.0  | 7.0 | 75.0 | 26.5 | 85.0  | 34.3 | 24.5 | 12.5 | 21.5 | 6.41 | 3.36 | 32.2 | 34.9 | 441.7 |
| 67 | IC529242 | 29.1 | 7.5 | 0.505 | 64.9 | 4.0  | 7.0 | 76.5 | 25.0 | 91.4  | 34.2 | 19.1 | 9.6  | 20.2 | 6.83 | 2.96 | 30.7 | 24.6 | 369.1 |
| 68 | IC536162 | 21.5 | 6.0 | 0.409 | 64.5 | 8.0  | 6.0 | 68.5 | 26.5 | 85.5  | 29.7 | 23.4 | 8.9  | 16.5 | 6.72 | 3.34 | 37.2 | 32.8 | 376.4 |
| 69 | IC536050 | 21.1 | 4.8 | 0.325 | 64.8 | 7.0  | 6.0 | 69.0 | 26.0 | 86.7  | 27.2 | 20.7 | 8.7  | 16.5 | 6.73 | 3.20 | 36.2 | 32.5 | 292.4 |
| 70 | IC252999 | 18.4 | 4.7 | 0.315 | 54.2 | 8.0  | 7.0 | 68.5 | 26.0 | 93.4  | 38.5 | 26.8 | 11.1 | 18.7 | 6.74 | 3.33 | 34.4 | 33.4 | 443.7 |
| 71 | IC443640 | 19.5 | 6.8 | 0.437 | 61.4 | 6.0  | 6.0 | 72.0 | 29.0 | 96.2  | 33.0 | 31.7 | 10.0 | 16.7 | 7.04 | 3.46 | 37.4 | 34.2 | 456.4 |
| 72 | IC445365 | 24.9 | 6.5 | 0.488 | 65.5 | 6.0  | 7.0 | 75.5 | 28.0 | 88.5  | 36.1 | 22.3 | 10.9 | 19.7 | 6.77 | 3.36 | 34.4 | 36.0 | 400.4 |
| 73 | IC303071 | 24.4 | 6.5 | 0.407 | 59.0 | 9.0  | 6.0 | 75.5 | 27.5 | 88.0  | 29.5 | 19.9 | 11.4 | 19.2 | 7.01 | 3.17 | 33.4 | 30.6 | 313.7 |
| 74 | IC252414 | 27.1 | 5.8 | 0.499 | 61.1 | 7.0  | 5.0 | 73.0 | 28.0 | 100.2 | 33.5 | 23.8 | 12.6 | 21.4 | 6.57 | 3.23 | 37.4 | 33.5 | 403.1 |
| 75 | IC372643 | 22.3 | 6.2 | 0.449 | 45.6 | 8.0  | 7.0 | 70.0 | 30.5 | 81.0  | 34.1 | 17.9 | 9.9  | 18.4 | 6.86 | 3.25 | 33.2 | 34.4 | 333.1 |
| 76 | IC252620 | 22.8 | 7.3 | 0.510 | 63.2 | 7.0  | 8.0 | 74.5 | 28.0 | 78.2  | 27.8 | 17.9 | 11.0 | 19.5 | 6.50 | 3.19 | 28.9 | 31.8 | 347.7 |
| 77 | IC240818 | 20.6 | 6.1 | 0.444 | 56.0 | 8.0  | 7.0 | 73.5 | 30.5 | 97.9  | 37.1 | 29.9 | 11.1 | 21.7 | 6.49 | 3.31 | 35.5 | 35.8 | 419.1 |
| 78 | IC401940 | 19.3 | 6.5 | 0.489 | 56.1 | 3.0  | 6.0 | 70.5 | 31.5 | 91.5  | 33.4 | 28.1 | 12.1 | 17.2 | 7.14 | 3.28 | 43.0 | 39.2 | 391.7 |
| 79 | IC443694 | 19.9 | 6.5 | 0.445 | 57.9 | 8.0  | 8.0 | 74.5 | 30.0 | 100.7 | 36.2 | 17.6 | 11.3 | 18.0 | 6.37 | 3.37 | 31.9 | 32.0 | 387.7 |
| 80 | IC542547 | 13.5 | 6.7 | 0.572 | 65.1 | 6.0  | 6.0 | 77.5 | 27.5 | 93.5  | 32.6 | 15.2 | 10.4 | 19.7 | 6.05 | 3.00 | 26.1 | 35.3 | 391.1 |

|    |                    |      |     |       |      |     |     |      |      |       |      |      |      |      |      |      |      |      |       |
|----|--------------------|------|-----|-------|------|-----|-----|------|------|-------|------|------|------|------|------|------|------|------|-------|
| 81 | EC190962           | 18.0 | 6.7 | 0.417 | 68.1 | 6.0 | 7.0 | 71.0 | 29.5 | 93.9  | 35.6 | 18.1 | 11.8 | 19.5 | 6.67 | 3.31 | 34.5 | 37.4 | 444.4 |
| 82 | EC576066           | 26.1 | 6.5 | 0.483 | 64.5 | 9.0 | 6.0 | 79.0 | 25.5 | 101.7 | 36.0 | 27.8 | 9.9  | 18.5 | 6.71 | 3.21 | 34.8 | 27.7 | 376.4 |
| 83 | EC573527           | 24.0 | 6.0 | 0.537 | 69.6 | 7.0 | 7.0 | 75.5 | 28.5 | 83.5  | 34.6 | 21.9 | 9.5  | 17.4 | 6.46 | 3.38 | 33.0 | 32.3 | 328.4 |
| 84 | EC576585           | 19.8 | 6.6 | 0.365 | 54.3 | 7.0 | 5.0 | 68.0 | 28.5 | 127.0 | 48.1 | 31.3 | 10.9 | 17.9 | 6.76 | 3.52 | 44.7 | 37.6 | 353.7 |
| 85 | EC190899           | 16.5 | 5.8 | 0.354 | 57.0 | 7.0 | 7.0 | 68.5 | 30.0 | 94.7  | 37.5 | 22.3 | 9.7  | 17.4 | 6.55 | 3.26 | 33.1 | 36.9 | 448.7 |
| 86 | EC574849           | 15.2 | 6.5 | 0.490 | 69.0 | 7.0 | 5.0 | 71.5 | 30.0 | 95.0  | 36.3 | 27.1 | 10.6 | 20.2 | 6.81 | 3.45 | 41.4 | 34.8 | 353.4 |
| 87 | EC576175           | 21.1 | 6.7 | 0.517 | 63.1 | 6.0 | 7.0 | 75.0 | 28.5 | 124.0 | 41.6 | 16.1 | 8.1  | 17.0 | 6.89 | 3.41 | 38.1 | 30.0 | 456.7 |
| 88 | IC582706           | 19.3 | 6.2 | 0.455 | 66.5 | 8.0 | 7.0 | 75.5 | 28.0 | 92.9  | 34.1 | 26.5 | 11.3 | 19.4 | 6.63 | 3.42 | 34.2 | 34.5 | 459.4 |
| 89 | IC393878           | 20.6 | 6.1 | 0.477 | 67.3 | 8.0 | 7.0 | 73.0 | 31.5 | 103.9 | 34.1 | 22.3 | 10.7 | 17.4 | 7.27 | 3.53 | 43.9 | 34.0 | 516.7 |
| 90 | IC542544           | 21.7 | 5.2 | 0.489 | 72.6 | 7.0 | 6.0 | 75.5 | 29.0 | 77.5  | 31.1 | 18.1 | 9.1  | 19.9 | 6.11 | 2.90 | 24.9 | 35.8 | 331.4 |
| 91 | IC566223           | 23.4 | 7.2 | 0.639 | 70.2 | 8.0 | 7.0 | 83.5 | 25.0 | 109.2 | 36.6 | 30.3 | 12.0 | 21.5 | 6.80 | 3.22 | 34.7 | 34.3 | 598.1 |
| 92 | IC342668           | 21.1 | 5.8 | 0.469 | 69.1 | 8.0 | 7.0 | 72.5 | 30.0 | 98.9  | 30.4 | 19.4 | 10.2 | 18.9 | 6.43 | 3.24 | 40.7 | 33.2 | 450.7 |
| 93 | IC535717           | 26.0 | 6.9 | 0.430 | 53.3 | 8.0 | 6.0 | 70.5 | 31.0 | 102.5 | 36.1 | 27.4 | 10.0 | 18.9 | 6.71 | 3.38 | 38.0 | 34.5 | 464.1 |
| 94 | IC553599           | 19.7 | 6.4 | 0.465 | 63.3 | 6.0 | 4.0 | 72.0 | 29.5 | 92.2  | 33.2 | 24.6 | 9.9  | 16.4 | 6.68 | 3.30 | 39.3 | 38.7 | 424.7 |
| 95 | EC277134           | 23.8 | 6.8 | 0.530 | 62.1 | 9.0 | 8.0 | 75.0 | 29.5 | 95.2  | 35.9 | 16.7 | 10.5 | 17.4 | 6.78 | 3.22 | 35.3 | 32.0 | 464.7 |
| 96 | CUO/79/<br>Pru 11A | 22.4 | 7.3 | 0.552 | 66.9 | 9.0 | 8.0 | 76.5 | 28.5 | 106.5 | 37.8 | 24.4 | 12.4 | 17.5 | 7.15 | 3.36 | 40.7 | 32.8 | 423.4 |

---

**CC**-Chlorophyll content, **CTD**-Canopy temperature depression, **NDVI**-Normalized difference vegetative index, **MSI**-Membrane stability index, **PW**-Plant waxiness, **LR**-Leaf rolling, **DA**-Days to 50 % anthesis, **GFP**-Grain filling Period, **PH**-Plant height, **PL**-Peduncle length, **FLA**-Flag leaf area, **SL**-Spike length, **NSS**-Number of spikelets per spike, **GL**-Grain length, **GW**-Grain width, **TGW**-Thousand grain weight, **HI**-Harvest index, **GY**- Grain yield.
