# Supplementary material for: Identification of Climate-Smart Bread Wheat Germplasm Lines With Enhanced Adaptation to Global Warming
Source: Preprints.org preprint supplement (doi:10.20944/preprints202305.2192.v1), 2023-05-31
Supplement: Supplementary file 3 [file supplementary]

**Supplementary Table S6** | Heat-stress tolerant and susceptible bread wheat accessions identified based on grain yield along with important physiological and yield contributing traits.

| Sl. No. | Accession       | CC   |      | CTD (°C) |      | NDVI  |       | MSI (%) |      | PW (0-10 scale) |      | LR (0-10 scale) |      | GFP (days) |      | FLA (cm <sup>2</sup> ) |      | Plant Height (cm) |       | PL (cm) |      | SL (cm) |      | TGW (g) |      | Grain Yield (g/m <sup>2</sup> ) |       |  |
|---------|-----------------|------|------|----------|------|-------|-------|---------|------|-----------------|------|-----------------|------|------------|------|------------------------|------|-------------------|-------|---------|------|---------|------|---------|------|---------------------------------|-------|--|
|         |                 | NS   | HS   | NS       | HS   | NS    | HS    | NS      | HS   | NS              | HS   | NS              | HS   | NS         | HS   | NS                     | HS   | NS                | HS    | NS      | HS   | NS      | HS   | NS      | HS   | NS                              | HS    |  |
| (a)     | Highly tolerant |      |      |          |      |       |       |         |      |                 |      |                 |      |            |      |                        |      |                   |       |         |      |         |      |         |      |                                 |       |  |
| 1.      | IC566223        | 26.0 | 23.4 | 8.7      | 7.2  | 0.720 | 0.639 | 68.0    | 70.2 | 8.0             | 8.0  | 6.0             | 7.0  | 35.0       | 25.0 | 41.3                   | 30.3 | 120.5             | 109.2 | 37.9    | 36.6 | 13.4    | 12.0 | 40.4    | 34.7 | 604.3                           | 598.1 |  |
| 2.      | IC335792        | 22.4 | 19.8 | 5.4      | 6.3  | 0.627 | 0.479 | 72.1    | 59.7 | 8.5             | 8.0  | 8.0             | 8.0  | 32.5       | 28.0 | 25.9                   | 14.2 | 84.9              | 80.7  | 29.4    | 29.9 | 9.4     | 9.3  | 34.0    | 29.9 | 593.4                           | 539.4 |  |
| 3.      | EC576707        | 24.0 | 20.3 | 5.0      | 8.0  | 0.557 | 0.452 | 76.2    | 48.0 | 4.0             | 7.0  | 5.0             | 5.0  | 32.0       | 29.0 | 33.7                   | 21.6 | 134.0             | 118.2 | 50.8    | 44.9 | 11.5    | 10.8 | 33.8    | 32.4 | 579.2                           | 534.7 |  |
| 4.      | IC535176        | 26.9 | 23.3 | 6.3      | 9.0  | 0.624 | 0.509 | 77.1    | 50.4 | 4.5             | 6.0  | 5.0             | 6.0  | 33.5       | 30.0 | 50.9                   | 29.7 | 122.2             | 112.2 | 54.1    | 53.8 | 12.7    | 11.5 | 47.1    | 45.0 | 593.9                           | 532.1 |  |
| 5.      | IC529207        | 32.2 | 32.1 | 4.7      | 6.2  | 0.680 | 0.549 | 56.5    | 63.2 | 10.0            | 10.0 | 7.0             | 8.0  | 28.0       | 26.5 | 40.8                   | 31.7 | 117.5             | 99.2  | 34.5    | 30.2 | 13.5    | 12.1 | 39.3    | 35.7 | 604.9                           | 527.4 |  |
| 6.      | IC128454        | 30.7 | 30.0 | 5.6      | 8.9  | 0.647 | 0.479 | 69.8    | 54.8 | 7.0             | 8.0  | 5.0             | 6.0  | 28.5       | 24.0 | 39.8                   | 30.5 | 111.9             | 92.5  | 40.5    | 31.9 | 12.6    | 10.8 | 34.9    | 29.1 | 546.0                           | 538.1 |  |
| 7.      | IC393878        | 24.0 | 20.6 | 9.0      | 6.1  | 0.560 | 0.477 | 70.5    | 67.3 | 7.0             | 8.0  | 6.0             | 7.0  | 39.5       | 31.5 | 30.7                   | 22.3 | 106.0             | 103.9 | 43.8    | 34.1 | 11.9    | 10.7 | 49.3    | 43.9 | 633.7                           | 516.7 |  |
| 8.      | IC416018        | 26.5 | 20.7 | 6.7      | 8.6  | 0.602 | 0.473 | 60.6    | 55.0 | 6.0             | 7.0  | 9.0             | 9.0  | 36.0       | 29.0 | 34.2                   | 14.4 | 89.5              | 87.4  | 33.4    | 28.1 | 11.1    | 11.5 | 47.1    | 37.6 | 605.9                           | 508.1 |  |
| 9.      | IC446713        | 22.4 | 23.5 | 6.7      | 9.2  | 0.610 | 0.505 | 63.2    | 49.8 | 4.5             | 5.0  | 4.0             | 5.0  | 35.5       | 29.0 | 36.1                   | 25.8 | 128.5             | 124.5 | 52.9    | 45.1 | 10.2    | 9.4  | 46.6    | 41.7 | 545.2                           | 505.4 |  |
| 10.     | IC265318        | 32.9 | 22.0 | 5.0      | 6.5  | 0.595 | 0.512 | 70.0    | 49.6 | 6.5             | 8.0  | 7.0             | 8.0  | 37.0       | 30.5 | 33.4                   | 24.6 | 98.9              | 90.5  | 35.6    | 32.5 | 11.9    | 10.3 | 38.5    | 36.4 | 508.0                           | 504.1 |  |
| 11.     | EC574731        | 32.8 | 24.2 | 2.7      | 6.5  | 0.617 | 0.549 | 69.3    | 47.2 | 6.5             | 7.0  | 5.0             | 7.0  | 30.0       | 24.5 | 41.3                   | 31.8 | 100.2             | 97.5  | 36.9    | 33.0 | 10.5    | 9.9  | 45.2    | 37.6 | 549.2                           | 500.7 |  |
| (b)     | Tolerant        |      |      |          |      |       |       |         |      |                 |      |                 |      |            |      |                        |      |                   |       |         |      |         |      |         |      |                                 |       |  |
| 12.     | IC543425        | 28.1 | 24.0 | 5.6      | 6.9  | 0.634 | 0.505 | 69.7    | 59.7 | 8.5             | 9.0  | 9.0             | 9    | 34.5       | 29.0 | 28.9                   | 18.0 | 103.7             | 92.2  | 38.9    | 32.6 | 12.0    | 10.4 | 39.7    | 31.9 | 508.0                           | 498.0 |  |
| 13.     | EC534487        | 25.5 | 23.2 | 6.6      | 10.9 | 0.632 | 0.494 | 67.3    | 58.7 | 7.0             | 8.0  | 6.0             | 7.0  | 33.0       | 29.0 | 39.3                   | 20.1 | 106.4             | 94.0  | 32.7    | 31.1 | 11.5    | 11.1 | 47.7    | 37.6 | 609.9                           | 496.1 |  |
| 14.     | IC416019        | 27.4 | 17.2 | 7.0      | 7.2  | 0.614 | 0.440 | 70.7    | 59.6 | 6.5             | 7.0  | 9.5             | 10.0 | 35.5       | 27.5 | 33.5                   | 17.1 | 88.7              | 84.7  | 29.5    | 28.3 | 10.7    | 9.4  | 49.1    | 36.8 | 542.5                           | 490.1 |  |
| 15.     | IC290191        | 25.2 | 25.5 | 3.4      | 5.9  | 0.632 | 0.438 | 55.7    | 60.2 | 4.0             | 5.0  | 4.5             | 6.0  | 32.5       | 25.5 | 35.1                   | 26.6 | 111.4             | 106.2 | 45.4    | 43.7 | 12.3    | 12.1 | 39.7    | 34.5 | 522.2                           | 482.7 |  |
| 16.     | IC252653        | 33.1 | 24.0 | 4.1      | 6.3  | 0.597 | 0.482 | 66.9    | 55.9 | 7.5             | 8.0  | 6.0             | 7.0  | 33.5       | 26.5 | 34.0                   | 18.0 | 115.4             | 99.2  | 43.7    | 38.1 | 10.7    | 11.0 | 37.5    | 28.5 | 613.4                           | 481.4 |  |
| 17.     | IC401976        | 30.2 | 28.6 | 5.8      | 8.3  | 0.652 | 0.519 | 65.2    | 52.0 | 8.0             | 8.0  | 6.0             | 6.0  | 36.0       | 30.5 | 77.0                   | 45.7 | 100.9             | 91.0  | 38.4    | 37.5 | 15.1    | 12.9 | 49.7    | 45.2 | 510.5                           | 478.1 |  |
| 18.     | IC252348        | 28.3 | 26.8 | 5.7      | 9.8  | 0.643 | 0.507 | 69.0    | 61.0 | 6.5             | 8.0  | 4.5             | 5.0  | 32.5       | 27.0 | 45.0                   | 29.8 | 123.5             | 110.0 | 44.9    | 38.4 | 12.8    | 12.6 | 46.9    | 41.9 | 488.0                           | 476.7 |  |
| 19.     | IC542578        | 21.2 | 17.0 | 4.4      | 6.1  | 0.614 | 0.480 | 53.6    | 61.2 | 6.5             | 7.0  | 6.5             | 7.0  | 32.0       | 26.5 | 29.8                   | 18.6 | 106.5             | 95.7  | 36.3    | 32.8 | 10.4    | 10.2 | 43.2    | 35.5 | 566.9                           | 474.1 |  |
| 20.     | IC539221        | 30.9 | 26.1 | 6.2      | 10.2 | 0.637 | 0.538 | 67.1    | 45.7 | 1.5             | 2.0  | 4.5             | 5.0  | 33.5       | 29.0 | 65.5                   | 32.5 | 124.9             | 121.4 | 46.3    | 43.9 | 14.1    | 13.5 | 51.8    | 46.6 | 593.2                           | 468.7 |  |
| 21.     | IC075240        | 29.4 | 23.9 | 6.6      | 9.0  | 0.627 | 0.569 | 58.6    | 50.3 | 4.5             | 6.0  | 4.0             | 5.0  | 35.0       | 28.0 | 38.6                   | 25.9 | 126.0             | 125.4 | 53.5    | 46.5 | 11.1    | 9.3  | 44.7    | 39.9 | 501.9                           | 460.1 |  |
| 22.     | IC539531        | 34.2 | 26.0 | 5.7      | 9.4  | 0.635 | 0.473 | 77.1    | 59.3 | 7.0             | 8.0  | 6.0             | 6.0  | 37.0       | 31.5 | 61.9                   | 27.0 | 90.5              | 85.4  | 35.8    | 35.4 | 12.3    | 11.0 | 48.5    | 42.6 | 517.2                           | 452.1 |  |
| 23.     | IC443661        | 31.0 | 24.5 | 7.3      | 10.7 | 0.697 | 0.532 | 71.8    | 49.3 | 6.0             | 6.0  | 6.5             | 7.0  | 34.0       | 29.0 | 52.8                   | 28.0 | 100.5             | 89.7  | 39.0    | 33.4 | 13.9    | 13.4 | 41.1    | 39.2 | 523.2                           | 413.4 |  |
| (c)     | Susceptible     |      |      |          |      |       |       |         |      |                 |      |                 |      |            |      |                        |      |                   |       |         |      |         |      |         |      |                                 |       |  |
| 24.     | IC443640        | 20.9 | 19.5 | 6.7      | 6.8  | 0.592 | 0.437 | 66.3    | 61.4 | 6.0             | 6.0  | 5.5             | 6.0  | 33.0       | 29.0 | 39.0                   | 31.7 | 106.7             | 96.2  | 35.8    | 33.0 | 11.2    | 10.0 | 41.8    | 37.4 | 625.5                           | 456.4 |  |
| 25.     | IC535717        | 32.0 | 26.0 | 6.9      | 6.9  | 0.574 | 0.430 | 64.6    | 53.3 | 8.0             | 8.0  | 5.5             | 6.0  | 36.0       | 31.0 | 37.2                   | 27.4 | 108.5             | 102.5 | 40.5    | 36.1 | 11.8    | 10.0 | 43.4    | 38.0 | 649.0                           | 464.1 |  |

|                                     |                   |      |      |     |      |       |       |      |      |      |      |     |      |      |      |      |      |       |       |      |      |      |      |      |      |       |       |
|-------------------------------------|-------------------|------|------|-----|------|-------|-------|------|------|------|------|-----|------|------|------|------|------|-------|-------|------|------|------|------|------|------|-------|-------|
| 26.                                 | IC573461          | 38.5 | 27.8 | 4.3 | 4.8  | 0.594 | 0.480 | 50.0 | 59.2 | 6.0  | 6.0  | 5.0 | 6.0  | 36.5 | 29.5 | 40.7 | 21.9 | 99.4  | 94.2  | 38.4 | 31.3 | 11.3 | 10.3 | 52.2 | 31.1 | 654.9 | 462.7 |
| 27.                                 | IC252999          | 24.9 | 18.4 | 6.3 | 4.7  | 0.592 | 0.315 | 67.7 | 54.2 | 7.0  | 8.0  | 5.5 | 7.0  | 37.5 | 26.0 | 36.4 | 26.8 | 101.2 | 93.4  | 41.0 | 38.5 | 11.7 | 11.1 | 39.6 | 34.4 | 627.5 | 443.7 |
| 28.                                 | IC572925          | 21.3 | 20.4 | 3.6 | 5.2  | 0.592 | 0.404 | 58.0 | 57.6 | 5.5  | 6.0  | 5.0 | 5.0  | 33.5 | 30.0 | 33.1 | 24.6 | 99.5  | 93.4  | 34.6 | 33.5 | 11.0 | 9.6  | 42.1 | 35.8 | 634.2 | 446.1 |
| 29.                                 | EC576175          | 24.5 | 21.1 | 8.9 | 6.7  | 0.603 | 0.517 | 66.6 | 63.1 | 4.0  | 6.0  | 7.0 | 7.0  | 34.5 | 28.5 | 29.6 | 16.1 | 131.4 | 124.0 | 47.6 | 41.6 | 10.1 | 8.1  | 44.4 | 38.1 | 661.7 | 456.7 |
| 30.                                 | EC277134          | 26.5 | 23.8 | 8.8 | 6.8  | 0.597 | 0.530 | 66.4 | 62.1 | 9.0  | 9.0  | 8.0 | 8.0  | 35.0 | 29.5 | 25.9 | 16.7 | 103.0 | 95.2  | 35.5 | 35.9 | 11.1 | 10.5 | 48.0 | 35.3 | 680.4 | 464.7 |
| 31.                                 | IC252619          | 24.5 | 22.8 | 6.8 | 6.8  | 0.650 | 0.445 | 72.6 | 66.2 | 7.5  | 7.0  | 6.5 | 7.0  | 35.0 | 26.5 | 37.0 | 24.5 | 102.9 | 85.0  | 39.1 | 34.3 | 13.0 | 12.5 | 40.2 | 32.2 | 659.5 | 441.7 |
| 32.                                 | IC252414          | 32.7 | 27.1 | 8.3 | 5.8  | 0.594 | 0.499 | 70.1 | 61.1 | 7.5  | 7.0  | 5.0 | 5.0  | 36.5 | 28.0 | 38.9 | 23.8 | 107.4 | 100.2 | 39.2 | 33.5 | 13.7 | 12.6 | 46.6 | 37.4 | 605.5 | 403.1 |
| 33.                                 | IC144911          | 28.1 | 20.8 | 4.4 | 5.9  | 0.592 | 0.467 | 52.8 | 53.2 | 8.5  | 9.0  | 6.5 | 7.0  | 33.0 | 29.5 | 35.9 | 18.2 | 108.5 | 97.9  | 38.8 | 37.9 | 11.5 | 10.6 | 35.0 | 31.1 | 648.9 | 425.4 |
| 34.                                 | IC252431          | 25.5 | 30.6 | 7.1 | 8.2  | 0.682 | 0.510 | 73.2 | 59.1 | 1.5  | 2.0  | 6.5 | 7.0  | 32.5 | 26.5 | 34.7 | 24.2 | 108.0 | 87.2  | 33.9 | 30.6 | 10.7 | 9.9  | 37.7 | 33.0 | 739.5 | 478.4 |
| <b>(d) Highly Susceptible</b>       |                   |      |      |     |      |       |       |      |      |      |      |     |      |      |      |      |      |       |       |      |      |      |      |      |      |       |       |
| 35.                                 | EC190899          | 30.3 | 16.5 | 6.8 | 5.8  | 0.572 | 0.354 | 56.9 | 57.0 | 6.5  | 7.0  | 6.0 | 7.0  | 36.5 | 30.0 | 34.2 | 22.3 | 101.0 | 94.7  | 43.1 | 37.5 | 11.9 | 9.7  | 41.1 | 33.1 | 732.4 | 448.7 |
| 36.                                 | IC443694          | 20.5 | 19.9 | 8.2 | 6.5  | 0.613 | 0.445 | 63.1 | 57.9 | 7.0  | 8.0  | 7.5 | 8.0  | 36.0 | 30.0 | 26.9 | 17.6 | 108.0 | 100.7 | 40.8 | 36.2 | 11.8 | 11.3 | 37.7 | 31.9 | 630.9 | 387.7 |
| 37.                                 | IC529242          | 30.3 | 29.1 | 7.4 | 7.5  | 0.672 | 0.505 | 69.8 | 64.9 | 3.0  | 4.0  | 4.5 | 7.0  | 33.5 | 25.0 | 36.8 | 19.1 | 105.9 | 91.4  | 40.4 | 34.2 | 11.2 | 9.6  | 40.5 | 30.7 | 600.9 | 369.1 |
| 38.                                 | IC553599          | 25.2 | 19.7 | 8.6 | 6.4  | 0.582 | 0.465 | 68.0 | 63.3 | 6.0  | 6.0  | 4.0 | 4.0  | 35.5 | 29.5 | 41.9 | 24.6 | 98.9  | 92.2  | 35.1 | 33.2 | 11.4 | 9.9  | 42.4 | 39.3 | 685.7 | 424.7 |
| 39.                                 | IC524299          | 29.8 | 25.7 | 4.3 | 5.1  | 0.615 | 0.474 | 66.7 | 70.6 | 6.5  | 7.0  | 4.5 | 7.0  | 37.0 | 29.0 | 33.3 | 19.8 | 106.2 | 95.7  | 34.7 | 28.5 | 11.1 | 10.8 | 50.5 | 34.1 | 709.5 | 422.7 |
| 40.                                 | EC576066          | 32.6 | 26.1 | 8.8 | 6.5  | 0.597 | 0.483 | 69.7 | 64.5 | 8.5  | 9.0  | 5.5 | 6.0  | 31.0 | 25.5 | 36.1 | 27.8 | 110.7 | 101.7 | 36.8 | 36.0 | 13.0 | 9.9  | 40.4 | 34.8 | 646.2 | 376.4 |
| 41.                                 | CUO/79/<br>Pru11A | 29.0 | 22.4 | 9.5 | 7.3  | 0.600 | 0.552 | 63.7 | 66.9 | 9.0  | 9.0  | 7.5 | 8.0  | 33.0 | 28.5 | 38.3 | 24.4 | 112.2 | 106.5 | 42.3 | 37.8 | 12.9 | 12.4 | 52.1 | 40.7 | 741.0 | 423.4 |
| 42.                                 | EC576585          | 23.1 | 19.8 | 8.2 | 6.6  | 0.607 | 0.365 | 69.7 | 54.3 | 6.5  | 7.0  | 5.0 | 5.0  | 36.5 | 28.5 | 37.2 | 31.3 | 131.9 | 127.0 | 53.2 | 48.1 | 11.8 | 10.9 | 48.5 | 44.7 | 637.5 | 353.7 |
| 43.                                 | IC536050          | 21.8 | 21.1 | 6.5 | 4.8  | 0.579 | 0.325 | 71.1 | 64.8 | 6.5  | 7.0  | 5.5 | 6.0  | 36.5 | 26.0 | 27.9 | 20.7 | 100.9 | 86.7  | 33.4 | 27.2 | 9.8  | 8.7  | 41.4 | 36.2 | 538.9 | 292.4 |
| 44.                                 | IC277741          | 23.8 | 17.6 | 5.6 | 8.4  | 0.673 | 0.565 | 77.5 | 58.3 | 5.0  | 6.0  | 4.0 | 4.0  | 34.5 | 29.5 | 54.0 | 21.3 | 133.9 | 113.4 | 41.7 | 39.2 | 13.3 | 12.4 | 38.0 | 35.8 | 802.5 | 416.1 |
| <b>(e) National check varieties</b> |                   |      |      |     |      |       |       |      |      |      |      |     |      |      |      |      |      |       |       |      |      |      |      |      |      |       |       |
| 45.                                 | Raj3765 (C1)      | 22.4 | 21.2 | 8.6 | 7.1  | 0.635 | 0.470 | 56.3 | 63.5 | 5.8  | 6.6  | 5.2 | 5.4  | 35.1 | 28.6 | 42.1 | 30.4 | 99.9  | 91.9  | 38.1 | 33.4 | 11.7 | 10.9 | 43.0 | 38.7 | 552.5 | 472.0 |
| 46.                                 | HD2932 (C2)       | 25.4 | 24.0 | 8.8 | 7.0  | 0.625 | 0.491 | 69.3 | 62.5 | 7.9  | 8.5  | 6.9 | 7.9  | 35.5 | 28.9 | 30.6 | 19.9 | 98.3  | 90.0  | 35.6 | 31.9 | 11.2 | 10.6 | 41.7 | 36.6 | 614.7 | 458.8 |
| 47.                                 | WR544 (C3)        | 25.4 | 25.3 | 7.7 | 6.7  | 0.580 | 0.404 | 64.6 | 60.0 | 5.3  | 6.0  | 4.8 | 5.2  | 38.2 | 30.7 | 42.6 | 33.4 | 105.2 | 101.3 | 44.5 | 41.0 | 11.8 | 10.7 | 44.6 | 37.7 | 655.1 | 472.1 |
| 48.                                 | HD2967 (C4)       | 31.9 | 34.0 | 9.2 | 8.0  | 0.658 | 0.558 | 64.0 | 66.3 | 7.8  | 8.0  | 6.7 | 6.4  | 33.7 | 28.8 | 33.0 | 25.1 | 99.9  | 90.8  | 33.7 | 31.3 | 10.9 | 10.0 | 44.9 | 36.2 | 665.2 | 518.7 |
|                                     | Minimum           | 17.4 | 13.5 | 2.6 | 4.4  | 0.542 | 0.315 | 50.0 | 43.7 | 1.0  | 2.0  | 2.5 | 4.0  | 24.0 | 23.5 | 21.9 | 14.2 | 84.9  | 73.2  | 29.4 | 27.0 | 8.7  | 8.1  | 30.0 | 24.9 | 300.0 | 176.7 |
|                                     | Maximum           | 38.5 | 37.2 | 9.7 | 12.0 | 0.722 | 0.642 | 77.5 | 72.6 | 10.0 | 10.0 | 9.5 | 10.0 | 39.5 | 32.0 | 77.0 | 51.7 | 150.9 | 127.0 | 60.1 | 53.8 | 15.6 | 13.5 | 52.2 | 46.6 | 802.5 | 598.1 |
|                                     | Pop mean          | 26.8 | 22.7 | 6.2 | 6.9  | 0.624 | 0.484 | 66.6 | 59.4 | 6.2  | 6.9  | 5.8 | 6.5  | 34.2 | 28.1 | 37.4 | 23.8 | 106.6 | 96.9  | 39.2 | 35.1 | 11.7 | 10.6 | 41.5 | 35.5 | 562.2 | 423.6 |
|                                     | LSD (5%)          | 2.5  | 2.3  | 1.7 | 1.5  | 0.033 | 0.032 | 5.0  | 4.7  | 0.8  | 0.8  | 0.6 | 0.7  | 2.0  | 1.9  | 4.2  | 3.1  | 4.9   | 4.8   | 2.9  | 2.2  | 0.6  | 0.5  | 2.1  | 2.6  | 49.0  | 21.0  |

**NS:** Non stressed environment; **HS:** Heat stressed environment; **LSD:** Least significant difference at 0.05 level of probability; **CC**-Chlorophyll content, **CTD**-Canopy temperature depression, **NDVI**-Normalized difference vegetation index, **MSI**-Membrane stability index, **PW**-Plant waxiness, **LR**-Leaf rolling, **GFP**-Grain filling period, **FLA**-Flag leaf area, **PL:** Peduncle length; **SL**-Spike length, **TGW**-1000-grains weight..
