# Supplementary material for: Identification of Climate-Smart Bread Wheat Germplasm Lines With Enhanced Adaptation to Global Warming
Source: Preprints.org preprint supplement (doi:10.20944/preprints202305.2192.v1), 2023-05-31
Supplement: Supplementary file 4 [file supplementary]

**Supplementary Table S5** | Mean performance and stability parameters of 96 bread wheat accessions for 1000-grain weight and grain yield based on Eberhart and Russell (1966) model.

| Sl. No. | Accessions | Thousand grains weight (g) |           |          | Grain yield (g/m <sup>2</sup> ) |           |          |
|---------|------------|----------------------------|-----------|----------|---------------------------------|-----------|----------|
|         |            | $\mu$ (mean)               | $\beta_i$ | $S^2D_i$ | $\mu$ (mean)                    | $\beta_i$ | $S^2D_i$ |
| 1.      | RAJ3765    | 40.8                       | 0.80      | 4.03     | 514.2                           | 0.61      | 35.67    |
| 2.      | HD2932     | 39.2                       | 1.02      | 7.19     | 538.1                           | 1.14      | 49.90    |
| 3.      | WR544      | 41.1                       | 0.99      | 3.10     | 562.8                           | 1.31      | 25.24    |
| 4.      | HD2967     | 40.5                       | 1.25      | 3.38     | 592.7                           | 1.03      | 46.12    |
| 5.      | EC574731   | 42.0                       | 0.99      | 0.22     | 520.7                           | 0.43      | 62.51    |
| 6.      | EC576707   | 33.7                       | 0.15      | 2.20     | 552.1                           | 0.36      | 37.58    |
| 7.      | IC252725   | 43.3                       | 0.97      | 3.18     | 525.2                           | 1.07      | 27.60    |
| 8.      | IC252816   | 38.3                       | 0.56      | 7.28     | 490.4                           | 0.95      | 22.91    |
| 9.      | IC277741   | 37.5                       | 0.68      | 42.16    | 597.6                           | 2.74      | 76.59    |
| 10.     | IC536081   | 38.8                       | 0.46      | 17.02    | 401.9                           | 1.36      | 7.88     |
| 11.     | IC279617   | 35.6                       | 0.29      | 8.29     | 448.7                           | 0.53      | 56.35    |
| 12.     | IC535176   | 46.7                       | 0.19      | 0.94     | 556.0                           | 0.47      | 61.91    |
| 13.     | IC401976   | 48.0                       | 0.73      | 4.67     | 493.3                           | 0.28      | 21.89    |
| 14.     | IC539221   | 49.8                       | 0.86      | 3.33     | 529.0                           | 0.94      | 12.34    |
| 15.     | IC539287   | 38.4                       | -0.07     | 17.53    | 261.5                           | 1.25      | 15.98    |
| 16.     | IC539531   | 46.1                       | 0.75      | 2.11     | 478.3                           | 0.50      | 49.48    |
| 17.     | IC443661   | 40.8                       | -0.06     | 1.18     | 463.9                           | 0.85      | 24.38    |
| 18.     | EC534487   | 43.2                       | 1.24      | 2.62     | 551.6                           | 0.92      | 80.85    |
| 19.     | IC416018   | 43.0                       | 0.89      | 13.29    | 553.8                           | 0.78      | 36.99    |
| 20.     | IC416075   | 44.9                       | 0.84      | 6.03     | 465.8                           | 0.28      | 114.68   |
| 21.     | IC416078   | 34.0                       | 1.31      | 8.70     | 493.0                           | 0.57      | 44.85    |
| 22.     | IC416019   | 43.6                       | 1.71      | 1.29     | 510.0                           | 0.41      | 55.05    |
| 23.     | IC446713   | 44.7                       | 0.62      | 1.02     | 522.7                           | 0.32      | 11.41    |
| 24.     | IC075240   | 42.9                       | 0.88      | 6.98     | 474.5                           | 0.33      | 63.50    |
| 25.     | EC178071   | 48.8                       | 0.95      | 13.11    | 444.9                           | -0.23     | 247.57   |
| 26.     | IC542509   | 29.7                       | 1.02      | 36.45    | 274.1                           | -0.29     | 455.28   |
| 27.     | IC252348   | 46.0                       | 1.38      | 16.61    | 480.1                           | -0.15     | 529.35   |
| 28.     | IC543293   | 36.0                       | 1.38      | 15.66    | 424.0                           | 1.14      | 353.21   |
| 29.     | IC128454   | 33.6                       | 1.05      | 1.91     | 543.6                           | -0.22     | 376.52   |
| 30.     | IC416055   | 32.6                       | 0.96      | 7.30     | 445.4                           | 0.29      | 677.95   |
| 31.     | IC111800   | 34.7                       | 1.15      | 24.15    | 457.9                           | -0.02     | 131.26   |
| 32.     | IC111931   | 37.7                       | 1.66      | 1.05     | 369.9                           | 0.22      | 321.60   |
| 33.     | EC576317   | 41.0                       | 0.37      | 0.37     | 360.3                           | 0.62      | 567.00   |
| 34.     | EC577013   | 33.9                       | 1.39      | 3.24     | 335.1                           | 1.24      | 425.31   |
| 35.     | EC414149   | 47.9                       | 1.45      | 13.85    | 352.7                           | 0.69      | 479.75   |
| 36.     | IC252653   | 34.6                       | 1.42      | 8.61     | 541.4                           | 0.77      | 384.38   |
| 37.     | IC252739   | 35.5                       | 1.05      | 4.62     | 491.3                           | 1.41      | 423.58   |
| 38.     | IC335792   | 33.6                       | 1.02      | 7.37     | 559.7                           | 0.20      | 446.45   |
| 39.     | IC543425   | 37.4                       | 1.32      | 0.09     | 487.2                           | -0.56     | 319.85   |
| 40.     | IC402055   | 43.5                       | 0.21      | 1.34     | 365.1                           | 0.43      | 369.43   |
| 41.     | IC265318   | 39.1                       | 0.71      | 11.30    | 500.7                           | -0.15     | 363.40   |
| 42.     | IC445449   | 33.9                       | 0.79      | 4.79     | 425.9                           | 1.09      | 291.42   |
| 43.     | IC528965   | 39.7                       | 1.39      | 9.27     | 471.8                           | 0.81      | 237.82   |
| 44.     | IC549437   | 40.7                       | 1.23      | 24.94    | 411.3                           | 1.03      | 388.82   |
| 45.     | IC144911   | 33.3                       | 0.81      | 0.05     | 537.0                           | 1.56      | 79.27    |
| 46.     | IC542578   | 39.5                       | 1.63      | 2.68     | 518.5                           | 0.65      | 8.90     |
| 47.     | IC535704   | 39.1                       | 0.69      | 6.14     | 503.9                           | 1.00      | 13.17    |
| 48.     | EC542533   | 30.3                       | 0.64      | 1.22     | 468.2                           | 0.71      | 34.06    |

|                 |                |             |      |        |              |      |        |
|-----------------|----------------|-------------|------|--------|--------------|------|--------|
| 49.             | IC542652       | 33.2        | 0.51 | 19.49  | 431.5        | 0.20 | 10.09  |
| 50.             | IC536468       | 41.9        | 1.19 | 2.76   | 507.7        | 1.05 | 24.20  |
| 51.             | IC536483       | 35.3        | 1.14 | 12.55  | 476.0        | 1.18 | 30.91  |
| 52.             | EC574735       | 35.0        | 1.09 | 7.17   | 510.2        | 0.75 | 9.67   |
| 53.             | IC531191       | 32.0        | 0.75 | 8.37   | 472.7        | 1.19 | 17.58  |
| 54.             | IC333095       | 36.2        | 1.02 | 6.23   | 494.8        | 0.94 | 32.03  |
| 55.             | IC572925       | 39.2        | 0.88 | 20.80  | 541.1        | 1.37 | 55.73  |
| 56.             | IC252867       | 41.9        | 0.88 | 11.79  | 516.1        | 1.12 | 16.25  |
| 57.             | IC524299       | 42.5        | 1.56 | 117.81 | 565.8        | 2.02 | 114.97 |
| 58.             | IC573461       | 41.8        | 2.86 | 46.15  | 558.5        | 1.39 | 34.86  |
| 59.             | IC252444       | 38.7        | 2.06 | 14.30  | 363.7        | 1.00 | 46.11  |
| 60.             | IC529207       | 37.7        | 1.06 | 26.18  | 563.5        | 0.55 | 5.10   |
| 61.             | IC290191       | 37.3        | 1.12 | 1.93   | 500.5        | 0.26 | 9.76   |
| 62.             | IC112258       | 34.9        | 1.33 | 12.70  | 522.5        | 1.41 | 35.37  |
| 63.             | IC627711       | 43.0        | 0.88 | 6.78   | 482.5        | 0.61 | 5.94   |
| 64.             | IC443653       | 36.5        | 1.31 | 33.10  | 508.1        | 1.31 | 30.44  |
| 65.             | IC252431       | 34.1        | 0.76 | 1.61   | 607.9        | 2.05 | 269.05 |
| 66.             | IC252619       | 35.0        | 1.39 | 1.74   | 545.9        | 1.70 | 112.16 |
| 67.             | IC529242       | 34.3        | 1.56 | 2.87   | 482.2        | 1.82 | 169.29 |
| 68.             | IC536162       | 37.5        | 0.82 | 12.49  | 471.0        | 1.55 | 170.89 |
| 69.             | IC536050       | 37.6        | 0.84 | 1.94   | 414.6        | 1.90 | 144.98 |
| 70.             | IC252999       | 35.7        | 0.90 | 4.28   | 534.1        | 1.49 | 224.54 |
| 71.             | IC443640       | 38.4        | 0.87 | 4.85   | 538.2        | 1.36 | 167.26 |
| 72.             | IC445365       | 35.1        | 1.12 | 20.33  | 499.5        | 1.61 | 227.49 |
| 73.             | IC303071       | 34.9        | 1.53 | 32.85  | 374.9        | 1.02 | 69.33  |
| 74.             | IC252414       | 40.7        | 1.45 | 4.76   | 501.7        | 1.56 | 73.93  |
| 75.             | IC372643       | 35.3        | 1.18 | 12.68  | 423.2        | 1.48 | 166.22 |
| 76.             | IC252620       | 31.1        | 1.01 | 0.37   | 442.3        | 1.55 | 166.20 |
| 77.             | IC240818       | 36.9        | 0.90 | 2.11   | 495.4        | 1.29 | 209.65 |
| 78.             | IC401940       | 44.1        | 0.57 | 5.15   | 455.9        | 1.11 | 113.08 |
| 79.             | IC443694       | 33.6        | 0.89 | 5.34   | 505.4        | 1.93 | 240.81 |
| 80.             | IC542547       | 27.6        | 1.02 | 4.22   | 486.9        | 1.57 | 104.72 |
| 81.             | EC190962       | 37.1        | 1.16 | 5.65   | 515.3        | 1.21 | 114.00 |
| 82.             | EC576066       | 36.4        | 0.33 | 11.99  | 509.6        | 2.10 | 230.58 |
| 83.             | EC573527       | 33.5        | 0.50 | 1.65   | 393.7        | 1.12 | 201.03 |
| 84.             | EC576585       | 45.4        | 0.75 | 7.26   | 492.9        | 2.19 | 178.97 |
| 85.             | EC190899       | 35.8        | 1.81 | 3.98   | 588.3        | 2.18 | 155.19 |
| 86.             | EC574849       | 42.8        | 1.04 | 3.30   | 432.2        | 1.25 | 230.28 |
| 87.             | EC576175       | 40.0        | 1.32 | 3.41   | 557.9        | 1.62 | 176.60 |
| 88.             | IC582706       | 36.5        | 1.01 | 19.14  | 517.5        | 1.00 | 109.69 |
| 89.             | IC393878       | 45.3        | 1.21 | 3.85   | 572.2        | 0.96 | 109.62 |
| 90.             | IC542544       | 28.2        | 0.85 | 61.15  | 380.9        | 0.86 | 100.43 |
| 91.             | IC566223       | 36.3        | 0.76 | 23.13  | 589.5        | 0.04 | 119.09 |
| 92.             | IC342668       | 44.6        | 1.31 | 34.64  | 515.2        | 1.04 | 72.22  |
| 93.             | IC535717       | 39.4        | 0.69 | 17.82  | 553.6        | 1.45 | 104.97 |
| 94.             | IC553599       | 39.6        | 0.66 | 2.56   | 550.5        | 1.98 | 57.60  |
| 95.             | EC277134       | 40.4        | 1.32 | 71.39  | 570.8        | 1.69 | 154.00 |
| 96.             | CUO/79/Pru 11A | 45.1        | 1.10 | 75.79  | 580.5        | 2.37 | 102.43 |
| <b>Pop Mean</b> |                | <b>38.6</b> | -    | -      | <b>489.4</b> | -    | -      |
