# Supplementary material for: Identification of Climate-Smart Bread Wheat Germplasm Lines With Enhanced Adaptation to Global Warming
Source: Preprints.org preprint supplement (doi:10.20944/preprints202305.2192.v1), 2023-05-31
Supplement: Supplementary file 5 [file supplementary]

**Supplementary Table S3** | Combined adjusted mean values for 18 morpho-physiological and yield contributing traits recorded in 96 accessions of bread wheat over two years 2018-19 and 2019-20 under non-stressed environment.

| Sl. No | Accession | CC   | CTD (°C) | NDVI  | MSI (%) | PW  | LR  | DA (days) | GFP (days) | PH (cm) | PL (cm) | FLA (cm <sup>2</sup> ) | SL (cm) | NSS  | GL (mm) | GW (mm) | TGW (g) | HI (%) | GY (g/m <sup>2</sup> ) |
|--------|-----------|------|----------|-------|---------|-----|-----|-----------|------------|---------|---------|------------------------|---------|------|---------|---------|---------|--------|------------------------|
| 1.     | Raj3765   | 22.4 | 8.6      | 0.635 | 56.3    | 5.8 | 5.2 | 91.6      | 35.1       | 99.9    | 38.1    | 42.1                   | 11.7    | 19.0 | 7.24    | 3.52    | 43.0    | 42.2   | 552.5                  |
| 2.     | HD2932    | 25.4 | 8.8      | 0.625 | 69.3    | 7.9 | 6.9 | 90.8      | 35.5       | 98.3    | 35.6    | 30.6                   | 11.2    | 19.8 | 6.59    | 3.69    | 41.7    | 44.8   | 614.7                  |
| 3.     | WR544     | 25.4 | 7.7      | 0.580 | 64.6    | 5.3 | 4.8 | 83.4      | 38.2       | 105.2   | 44.5    | 42.6                   | 11.8    | 18.7 | 6.88    | 3.67    | 44.6    | 44.4   | 655.1                  |
| 4.     | HD2967    | 31.9 | 9.2      | 0.658 | 64.0    | 7.8 | 6.7 | 95.6      | 33.7       | 99.9    | 33.7    | 33.0                   | 10.9    | 19.7 | 6.48    | 3.65    | 44.9    | 45.8   | 665.2                  |
| 5.     | EC574731  | 32.8 | 2.7      | 0.617 | 69.3    | 6.5 | 5.0 | 94.0      | 30.0       | 100.2   | 36.9    | 41.3                   | 10.5    | 20.7 | 7.44    | 3.42    | 45.2    | 41.4   | 549.2                  |
| 6.     | EC576707  | 24.0 | 5.0      | 0.557 | 76.2    | 4.0 | 5.0 | 90.5      | 32.0       | 134.0   | 50.8    | 33.7                   | 11.5    | 20.7 | 6.58    | 3.27    | 33.8    | 37.0   | 579.2                  |
| 7.     | IC252725  | 27.4 | 4.0      | 0.620 | 66.5    | 7.0 | 7.0 | 90.5      | 36.5       | 104.9   | 39.7    | 38.1                   | 12.9    | 19.5 | 6.71    | 3.58    | 46.4    | 40.5   | 598.5                  |
| 8.     | IC252816  | 20.0 | 4.7      | 0.582 | 72.3    | 4.0 | 4.5 | 91.5      | 35.5       | 138.5   | 48.5    | 37.3                   | 10.5    | 19.4 | 7.23    | 3.25    | 39.2    | 33.5   | 554.5                  |
| 9.     | IC277741  | 23.8 | 5.6      | 0.673 | 77.5    | 5.0 | 4.0 | 98.5      | 34.5       | 133.9   | 41.7    | 54.0                   | 13.3    | 22.4 | 7.03    | 3.25    | 38.0    | 30.3   | 802.5                  |
| 10.    | IC536081  | 22.8 | 5.7      | 0.614 | 67.6    | 7.5 | 4.5 | 92.0      | 32.0       | 117.5   | 46.8    | 48.2                   | 11.9    | 21.5 | 6.90    | 3.40    | 41.3    | 39.4   | 499.2                  |
| 11.    | IC279617  | 30.0 | 5.8      | 0.650 | 72.1    | 7.5 | 6.5 | 92.0      | 33.5       | 100.7   | 35.1    | 50.1                   | 12.5    | 21.2 | 6.66    | 3.41    | 36.2    | 38.2   | 482.5                  |
| 12.    | IC535176  | 26.9 | 6.3      | 0.624 | 77.1    | 4.5 | 5.0 | 92.5      | 33.5       | 122.2   | 54.1    | 50.9                   | 12.7    | 22.5 | 7.23    | 3.67    | 47.1    | 36.4   | 593.9                  |
| 13.    | IC401976  | 30.2 | 5.8      | 0.652 | 65.2    | 8.0 | 6.0 | 92.0      | 36.0       | 100.9   | 38.4    | 77.0                   | 15.1    | 24.0 | 7.42    | 3.77    | 49.7    | 36.8   | 510.5                  |
| 14.    | IC539221  | 30.9 | 6.2      | 0.637 | 67.1    | 1.5 | 4.5 | 91.5      | 33.5       | 124.9   | 46.3    | 65.5                   | 14.1    | 21.9 | 7.12    | 3.60    | 51.8    | 36.2   | 593.2                  |
| 15.    | IC539287  | 20.2 | 6.3      | 0.648 | 63.9    | 2.0 | 2.5 | 88.5      | 32.5       | 126.2   | 39.9    | 38.2                   | 8.7     | 20.4 | 8.76    | 2.84    | 39.3    | 29.2   | 353.2                  |
| 16.    | IC539531  | 34.2 | 5.7      | 0.635 | 77.1    | 7.0 | 6.0 | 89.0      | 37.0       | 90.5    | 35.8    | 61.9                   | 12.3    | 23.0 | 7.10    | 3.64    | 48.5    | 42.7   | 517.2                  |
| 17.    | IC443661  | 31.0 | 7.3      | 0.697 | 71.8    | 6.0 | 6.5 | 98.5      | 34.0       | 100.5   | 39.0    | 52.8                   | 13.9    | 21.9 | 6.77    | 3.52    | 41.1    | 37.1   | 523.2                  |
| 18.    | EC534487  | 25.5 | 6.6      | 0.632 | 67.3    | 7.0 | 6.0 | 94.0      | 33.0       | 106.4   | 32.7    | 39.3                   | 11.5    | 22.2 | 6.80    | 3.64    | 47.7    | 44.2   | 609.9                  |
| 19.    | IC416018  | 26.5 | 6.7      | 0.602 | 60.6    | 6.0 | 9.0 | 88.0      | 36.0       | 89.5    | 33.4    | 34.2                   | 11.1    | 19.0 | 7.37    | 3.47    | 47.1    | 50.6   | 605.9                  |
| 20.    | IC416075  | 24.0 | 5.8      | 0.584 | 57.7    | 6.5 | 6.0 | 87.5      | 36.5       | 89.4    | 35.8    | 35.2                   | 10.4    | 18.9 | 7.30    | 3.61    | 46.6    | 39.4   | 483.2                  |
| 21.    | IC416078  | 28.9 | 7.0      | 0.603 | 63.2    | 5.5 | 7.5 | 90.0      | 34.5       | 89.2    | 30.6    | 39.3                   | 11.6    | 21.9 | 6.65    | 3.29    | 36.9    | 38.9   | 530.5                  |
| 22.    | IC416019  | 27.4 | 7.0      | 0.614 | 70.7    | 6.5 | 9.5 | 88.5      | 35.5       | 88.7    | 29.5    | 33.5                   | 10.7    | 18.2 | 7.38    | 3.53    | 49.1    | 43.2   | 542.5                  |
| 23.    | IC446713  | 22.4 | 6.7      | 0.610 | 63.2    | 4.5 | 4.0 | 91.5      | 35.5       | 128.5   | 52.9    | 36.1                   | 10.2    | 18.2 | 6.79    | 3.47    | 46.6    | 37.8   | 545.2                  |
| 24.    | IC075240  | 29.4 | 6.6      | 0.627 | 58.6    | 4.5 | 4.0 | 92.0      | 35.0       | 126.0   | 53.5    | 38.6                   | 11.1    | 18.9 | 6.93    | 3.59    | 44.7    | 33.2   | 501.9                  |
| 25.    | EC178071  | 28.7 | 5.1      | 0.652 | 72.7    | 6.0 | 4.5 | 96.0      | 31.0       | 100.2   | 42.7    | 41.9                   | 13.2    | 20.7 | 7.01    | 3.49    | 49.0    | 42.6   | 462.7                  |
| 26.    | IC542509  | 25.7 | 4.5      | 0.722 | 75.8    | 7.0 | 4.5 | 119.0     | 24.0       | 109.4   | 34.9    | 59.8                   | 15.6    | 21.2 | 6.98    | 2.84    | 30.0    | 21.6   | 300.0                  |

|     |          |      |     |       |      |      |     |      |      |       |      |      |      |      |      |      |      |      |       |
|-----|----------|------|-----|-------|------|------|-----|------|------|-------|------|------|------|------|------|------|------|------|-------|
| 27. | IC252348 | 28.3 | 5.7 | 0.643 | 69.0 | 6.5  | 4.5 | 95.0 | 32.5 | 123.5 | 44.9 | 45.0 | 12.8 | 20.2 | 7.22 | 3.46 | 46.9 | 35.3 | 488.0 |
| 28. | IC543293 | 30.8 | 5.9 | 0.682 | 66.7 | 8.0  | 5.0 | 98.5 | 30.5 | 103.5 | 34.3 | 33.2 | 11.1 | 20.9 | 6.46 | 3.50 | 37.0 | 45.3 | 522.7 |
| 29. | IC128454 | 30.7 | 5.6 | 0.647 | 69.8 | 7.0  | 5.0 | 99.0 | 28.5 | 111.9 | 40.5 | 39.8 | 12.6 | 22.0 | 6.74 | 3.42 | 34.9 | 37.9 | 546.0 |
| 30. | IC416055 | 23.0 | 4.7 | 0.632 | 77.1 | 7.5  | 9.0 | 92.0 | 35.0 | 99.2  | 33.2 | 21.9 | 11.1 | 20.7 | 6.43 | 3.25 | 32.9 | 42.8 | 490.7 |
| 31. | IC111800 | 36.2 | 5.5 | 0.635 | 72.5 | 7.5  | 6.5 | 91.5 | 35.0 | 101.2 | 35.0 | 35.9 | 12.3 | 20.2 | 7.11 | 3.37 | 35.0 | 32.5 | 466.0 |
| 32. | IC111931 | 18.9 | 4.4 | 0.574 | 72.0 | 6.5  | 6.0 | 92.0 | 34.0 | 104.5 | 43.6 | 34.4 | 12.6 | 19.7 | 7.01 | 3.50 | 40.7 | 38.7 | 402.0 |
| 33. | EC576317 | 22.0 | 4.5 | 0.570 | 68.2 | 4.5  | 4.5 | 86.5 | 37.5 | 123.4 | 52.6 | 26.7 | 9.6  | 16.0 | 6.34 | 3.59 | 40.7 | 30.1 | 422.7 |
| 34. | EC577013 | 21.9 | 5.3 | 0.652 | 70.8 | 4.5  | 5.0 | 98.5 | 29.5 | 150.9 | 60.1 | 37.7 | 11.8 | 19.2 | 5.97 | 3.40 | 35.8 | 27.7 | 441.4 |
| 35. | EC414149 | 36.5 | 2.6 | 0.662 | 68.4 | 7.5  | 6.0 | 90.0 | 34.5 | 90.7  | 31.0 | 40.3 | 9.0  | 19.7 | 6.83 | 4.02 | 50.0 | 35.2 | 422.0 |
| 36. | IC252653 | 33.1 | 4.1 | 0.597 | 66.9 | 7.5  | 6.0 | 91.5 | 33.5 | 115.4 | 43.7 | 34.0 | 10.7 | 19.7 | 6.32 | 3.54 | 37.5 | 41.5 | 613.4 |
| 37. | IC252739 | 30.7 | 3.8 | 0.667 | 66.3 | 6.0  | 5.0 | 93.0 | 33.5 | 99.7  | 38.1 | 38.8 | 12.1 | 21.2 | 6.87 | 3.63 | 36.3 | 41.2 | 608.7 |
| 38. | IC335792 | 22.4 | 5.4 | 0.627 | 72.1 | 8.5  | 8.0 | 92.0 | 32.5 | 84.9  | 29.4 | 25.9 | 9.4  | 20.0 | 6.35 | 3.35 | 34.0 | 46.3 | 593.4 |
| 39. | IC543425 | 28.1 | 5.6 | 0.634 | 69.7 | 8.5  | 9.0 | 92.5 | 34.5 | 103.7 | 38.9 | 28.9 | 12.0 | 22.7 | 6.40 | 3.51 | 39.7 | 38.4 | 508.0 |
| 40. | IC402055 | 25.2 | 6.0 | 0.655 | 71.3 | 2.0  | 3.5 | 90.0 | 36.0 | 127.4 | 46.3 | 35.8 | 11.0 | 19.5 | 7.19 | 3.46 | 42.9 | 31.4 | 412.7 |
| 41. | IC265318 | 32.9 | 5.0 | 0.595 | 70.0 | 6.5  | 7.0 | 87.5 | 37.0 | 98.9  | 35.6 | 33.4 | 11.9 | 18.0 | 6.95 | 3.44 | 38.5 | 42.0 | 508.0 |
| 42. | IC445449 | 28.6 | 5.4 | 0.705 | 63.0 | 5.5  | 7.0 | 99.5 | 33.5 | 101.7 | 43.0 | 44.6 | 12.3 | 21.2 | 6.67 | 3.45 | 35.6 | 37.3 | 517.4 |
| 43. | IC528965 | 31.1 | 5.6 | 0.629 | 76.2 | 10.0 | 7.0 | 97.0 | 30.5 | 123.2 | 39.5 | 37.9 | 12.2 | 21.7 | 6.93 | 3.35 | 41.4 | 36.2 | 541.4 |
| 44. | IC549437 | 26.3 | 4.3 | 0.710 | 76.0 | 1.0  | 7.5 | 99.0 | 30.0 | 98.9  | 30.2 | 27.3 | 11.9 | 17.7 | 7.06 | 3.40 | 42.0 | 36.3 | 501.4 |
| 45. | IC144911 | 28.1 | 4.4 | 0.592 | 52.8 | 8.5  | 6.5 | 92.0 | 33.0 | 108.5 | 38.8 | 35.9 | 11.5 | 21.4 | 6.44 | 3.39 | 35.0 | 39.0 | 648.9 |
| 46. | IC542578 | 21.2 | 4.4 | 0.614 | 53.6 | 6.5  | 6.5 | 93.0 | 32.0 | 106.5 | 36.3 | 29.8 | 10.4 | 20.2 | 6.81 | 3.55 | 43.2 | 42.7 | 566.9 |
| 47. | IC535704 | 22.7 | 3.9 | 0.617 | 53.5 | 6.0  | 5.5 | 87.5 | 36.0 | 103.9 | 37.6 | 34.6 | 11.1 | 18.2 | 6.55 | 3.57 | 41.3 | 39.2 | 576.9 |
| 48. | EC542533 | 24.3 | 4.4 | 0.645 | 55.5 | 4.5  | 5.0 | 93.5 | 32.0 | 104.5 | 32.7 | 35.2 | 11.8 | 21.0 | 6.40 | 3.18 | 31.8 | 41.0 | 524.2 |
| 49. | IC542652 | 23.2 | 3.1 | 0.609 | 58.5 | 7.0  | 5.5 | 93.0 | 34.5 | 106.0 | 38.9 | 42.0 | 11.0 | 18.7 | 6.75 | 3.31 | 32.9 | 30.5 | 448.9 |
| 50. | IC536468 | 24.2 | 4.6 | 0.590 | 53.2 | 5.0  | 6.0 | 90.0 | 34.0 | 107.3 | 38.4 | 30.3 | 10.7 | 20.2 | 6.71 | 3.59 | 45.3 | 40.5 | 586.2 |
| 51. | IC536483 | 28.4 | 4.9 | 0.672 | 61.1 | 6.5  | 5.5 | 97.0 | 31.5 | 94.0  | 33.7 | 37.8 | 11.2 | 22.2 | 6.31 | 3.48 | 37.3 | 41.5 | 564.2 |
| 52. | EC574735 | 24.8 | 3.6 | 0.650 | 64.4 | 2.5  | 7.0 | 94.0 | 33.0 | 98.9  | 39.1 | 28.2 | 11.1 | 19.4 | 6.38 | 3.42 | 38.5 | 38.9 | 565.5 |
| 53. | IC531191 | 27.5 | 3.0 | 0.644 | 57.8 | 5.5  | 6.0 | 93.0 | 35.0 | 89.5  | 32.5 | 30.8 | 11.6 | 21.2 | 6.56 | 3.29 | 34.6 | 40.1 | 557.5 |
| 54. | IC333095 | 24.7 | 4.2 | 0.607 | 61.5 | 7.5  | 6.0 | 91.0 | 34.5 | 102.2 | 39.2 | 32.3 | 12.2 | 20.7 | 6.53 | 3.84 | 38.6 | 42.7 | 566.9 |
| 55. | IC572925 | 21.3 | 3.6 | 0.592 | 58.0 | 5.5  | 5.0 | 88.0 | 33.5 | 99.5  | 34.6 | 33.1 | 11.0 | 17.4 | 7.15 | 3.65 | 42.1 | 45.4 | 634.2 |

|     |          |      |     |       |      |      |     |       |      |       |      |      |      |      |      |      |      |      |       |
|-----|----------|------|-----|-------|------|------|-----|-------|------|-------|------|------|------|------|------|------|------|------|-------|
| 56. | IC252867 | 29.8 | 4.1 | 0.542 | 57.2 | 8.5  | 5.0 | 84.0  | 37.5 | 107.9 | 40.8 | 37.9 | 11.5 | 18.9 | 6.98 | 3.61 | 44.6 | 42.8 | 597.5 |
| 57. | IC524299 | 29.8 | 4.3 | 0.615 | 66.7 | 6.5  | 4.5 | 88.0  | 37.0 | 106.2 | 34.7 | 33.3 | 11.1 | 21.2 | 7.08 | 3.62 | 50.5 | 43.4 | 709.5 |
| 58. | IC573461 | 38.5 | 4.3 | 0.594 | 50.0 | 6.0  | 5.0 | 87.5  | 36.5 | 99.4  | 38.4 | 40.7 | 11.3 | 18.7 | 7.31 | 3.81 | 52.2 | 42.7 | 654.9 |
| 59. | IC252444 | 35.0 | 4.8 | 0.700 | 58.9 | 1.0  | 5.0 | 95.5  | 33.5 | 105.5 | 32.4 | 36.0 | 12.6 | 19.4 | 7.19 | 3.13 | 42.6 | 34.4 | 430.2 |
| 60. | IC529207 | 32.2 | 4.7 | 0.680 | 56.5 | 10.0 | 7.0 | 102.0 | 28.0 | 117.5 | 34.5 | 40.8 | 13.5 | 22.4 | 6.44 | 3.44 | 39.3 | 36.1 | 604.9 |
| 61. | IC290191 | 25.2 | 3.4 | 0.632 | 55.7 | 4.0  | 4.5 | 93.5  | 32.5 | 111.4 | 45.4 | 35.1 | 12.3 | 20.5 | 6.87 | 3.47 | 39.7 | 38.2 | 522.2 |
| 62. | IC112258 | 26.4 | 5.5 | 0.637 | 55.5 | 6.0  | 6.5 | 95.0  | 31.5 | 113.4 | 38.6 | 42.1 | 12.4 | 21.4 | 7.24 | 2.97 | 39.3 | 38.9 | 620.9 |
| 63. | IC627711 | 25.3 | 6.4 | 0.608 | 56.8 | 4.5  | 3.5 | 91.5  | 35.5 | 131.5 | 49.3 | 38.9 | 11.8 | 18.9 | 7.27 | 3.43 | 44.2 | 32.5 | 524.9 |
| 64. | IC443653 | 24.2 | 6.1 | 0.635 | 52.0 | 7.0  | 4.0 | 91.0  | 35.5 | 86.0  | 36.6 | 33.7 | 10.2 | 16.9 | 7.04 | 3.55 | 39.3 | 36.5 | 599.5 |
| 65. | IC252431 | 25.5 | 7.1 | 0.682 | 73.2 | 1.5  | 6.5 | 95.5  | 32.5 | 108.0 | 33.9 | 34.7 | 10.7 | 20.2 | 6.50 | 3.50 | 37.7 | 41.0 | 739.5 |
| 66. | IC252619 | 24.5 | 6.8 | 0.650 | 72.6 | 7.5  | 6.5 | 93.0  | 35.0 | 102.9 | 39.1 | 37.0 | 13.0 | 21.9 | 6.85 | 3.63 | 40.2 | 45.9 | 659.5 |
| 67. | IC529242 | 30.3 | 7.4 | 0.672 | 69.8 | 3.0  | 4.5 | 94.5  | 33.5 | 105.9 | 40.4 | 36.8 | 11.2 | 22.0 | 6.88 | 3.40 | 40.5 | 39.9 | 600.9 |
| 68. | IC536162 | 22.4 | 5.6 | 0.598 | 64.7 | 8.0  | 6.5 | 85.5  | 37.5 | 97.5  | 35.7 | 31.6 | 10.3 | 19.4 | 6.79 | 3.61 | 40.3 | 41.7 | 570.9 |
| 69. | IC536050 | 21.8 | 6.5 | 0.579 | 71.1 | 6.5  | 5.5 | 84.5  | 36.5 | 100.9 | 33.4 | 27.9 | 9.8  | 20.0 | 6.97 | 3.44 | 41.4 | 44.6 | 538.9 |
| 70. | IC252999 | 24.9 | 6.3 | 0.592 | 67.7 | 7.0  | 5.5 | 85.0  | 37.5 | 101.2 | 41.0 | 36.4 | 11.7 | 19.5 | 7.00 | 3.58 | 39.6 | 41.4 | 627.5 |
| 71. | IC443640 | 20.9 | 6.7 | 0.592 | 66.3 | 6.0  | 5.5 | 90.0  | 33.0 | 106.7 | 35.8 | 39.0 | 11.2 | 18.7 | 7.21 | 3.60 | 41.8 | 41.6 | 625.5 |
| 72. | IC445365 | 26.9 | 8.8 | 0.645 | 71.6 | 6.5  | 6.0 | 93.0  | 33.5 | 101.4 | 39.8 | 44.5 | 12.9 | 21.5 | 6.91 | 3.53 | 38.3 | 39.7 | 601.5 |
| 73. | IC303071 | 24.9 | 8.6 | 0.629 | 65.2 | 9.0  | 6.0 | 91.0  | 34.0 | 100.9 | 34.2 | 40.0 | 11.5 | 20.0 | 7.15 | 3.48 | 39.0 | 34.3 | 441.5 |
| 74. | IC252414 | 32.7 | 8.3 | 0.594 | 70.1 | 7.5  | 5.0 | 86.5  | 36.5 | 107.4 | 39.2 | 38.9 | 13.7 | 22.0 | 6.94 | 3.50 | 46.6 | 43.3 | 605.5 |
| 75. | IC372643 | 26.7 | 8.5 | 0.583 | 76.4 | 7.5  | 6.0 | 89.0  | 37.5 | 87.5  | 36.1 | 33.3 | 11.5 | 19.5 | 7.10 | 3.52 | 39.8 | 47.3 | 518.9 |
| 76. | IC252620 | 24.9 | 8.4 | 0.625 | 74.8 | 7.0  | 8.0 | 91.5  | 34.0 | 88.4  | 31.5 | 25.6 | 11.1 | 20.7 | 6.54 | 3.33 | 35.9 | 45.7 | 542.2 |
| 77. | IC240818 | 24.2 | 7.2 | 0.612 | 71.7 | 7.5  | 5.5 | 91.0  | 34.5 | 102.7 | 39.8 | 41.6 | 12.9 | 20.7 | 6.69 | 3.61 | 40.8 | 40.2 | 575.5 |
| 78. | IC401940 | 28.5 | 8.1 | 0.558 | 73.9 | 1.5  | 5.5 | 86.0  | 38.0 | 98.2  | 39.7 | 34.9 | 12.8 | 20.4 | 7.61 | 3.57 | 47.8 | 45.5 | 528.9 |
| 79. | IC443694 | 20.5 | 8.2 | 0.613 | 63.1 | 7.0  | 7.5 | 91.5  | 36.0 | 108.0 | 40.8 | 26.9 | 11.8 | 18.9 | 6.49 | 3.68 | 37.7 | 37.4 | 630.9 |
| 80. | IC542547 | 17.4 | 8.5 | 0.632 | 74.4 | 5.5  | 5.0 | 94.5  | 32.5 | 105.9 | 40.7 | 29.8 | 10.9 | 21.2 | 6.40 | 3.24 | 31.7 | 39.5 | 591.5 |
| 81. | EC190962 | 26.6 | 9.7 | 0.583 | 74.4 | 5.5  | 6.0 | 88.0  | 34.5 | 102.7 | 38.9 | 33.0 | 12.5 | 20.2 | 7.02 | 3.62 | 42.2 | 43.6 | 594.9 |
| 82. | EC576066 | 32.6 | 8.8 | 0.597 | 69.7 | 8.5  | 5.5 | 94.5  | 31.0 | 110.7 | 36.8 | 36.1 | 13.0 | 21.5 | 6.95 | 3.43 | 40.4 | 43.5 | 646.2 |
| 83. | EC573527 | 32.1 | 7.4 | 0.640 | 77.5 | 6.0  | 6.5 | 92.5  | 34.5 | 90.0  | 36.4 | 32.2 | 11.5 | 19.7 | 6.63 | 3.50 | 36.4 | 43.4 | 462.9 |
| 84. | EC576585 | 23.1 | 8.2 | 0.607 | 69.7 | 6.5  | 5.0 | 85.0  | 36.5 | 131.9 | 53.2 | 37.2 | 11.8 | 18.7 | 7.08 | 3.68 | 48.5 | 42.3 | 637.5 |

|     |                   |      |     |       |      |     |     |      |      |       |      |      |      |      |      |      |      |      |       |
|-----|-------------------|------|-----|-------|------|-----|-----|------|------|-------|------|------|------|------|------|------|------|------|-------|
| 85. | EC190899          | 30.3 | 6.8 | 0.572 | 56.9 | 6.5 | 6.0 | 86.5 | 36.5 | 101.0 | 43.1 | 34.2 | 11.9 | 18.0 | 7.21 | 3.62 | 41.1 | 44.3 | 732.4 |
| 86. | EC574849          | 22.5 | 7.9 | 0.624 | 69.7 | 6.5 | 5.5 | 88.0 | 37.0 | 105.9 | 40.4 | 41.8 | 12.1 | 20.4 | 7.14 | 3.73 | 46.6 | 38.2 | 507.0 |
| 87. | EC576175          | 24.5 | 8.9 | 0.603 | 66.6 | 4.0 | 7.0 | 92.0 | 34.5 | 131.4 | 47.6 | 29.6 | 10.1 | 19.0 | 7.17 | 3.52 | 44.4 | 36.6 | 661.7 |
| 88. | IC582706          | 30.7 | 8.3 | 0.599 | 66.4 | 7.5 | 5.5 | 92.0 | 34.0 | 103.9 | 36.3 | 38.3 | 12.4 | 20.5 | 6.80 | 3.50 | 41.5 | 37.3 | 581.7 |
| 89. | IC393878          | 24.0 | 9.0 | 0.560 | 70.5 | 7.0 | 6.0 | 89.5 | 39.5 | 106.0 | 43.8 | 30.7 | 11.9 | 18.7 | 7.53 | 3.76 | 49.3 | 46.2 | 633.7 |
| 90. | IC542544          | 29.3 | 8.3 | 0.637 | 71.9 | 5.5 | 6.0 | 94.0 | 35.5 | 92.5  | 35.9 | 29.1 | 9.4  | 20.0 | 6.11 | 3.30 | 34.0 | 40.3 | 435.7 |
| 91. | IC566223          | 26.0 | 8.7 | 0.720 | 68.0 | 8.0 | 6.0 | 96.5 | 35.0 | 120.5 | 37.9 | 41.3 | 13.4 | 22.4 | 7.17 | 3.39 | 40.4 | 40.1 | 604.3 |
| 92. | IC342668          | 24.9 | 8.6 | 0.595 | 68.0 | 7.0 | 7.0 | 88.0 | 36.5 | 107.5 | 33.8 | 23.5 | 11.9 | 20.4 | 7.01 | 3.51 | 51.1 | 41.5 | 582.4 |
| 93. | IC535717          | 32.0 | 6.9 | 0.574 | 64.6 | 8.0 | 5.5 | 86.0 | 36.0 | 108.5 | 40.5 | 37.2 | 11.8 | 20.0 | 6.95 | 3.52 | 43.4 | 42.1 | 649.0 |
| 94. | IC553599          | 25.2 | 8.6 | 0.582 | 68.0 | 6.0 | 4.0 | 88.0 | 35.5 | 98.9  | 35.1 | 41.9 | 11.4 | 18.5 | 6.76 | 3.58 | 42.4 | 41.9 | 685.7 |
| 95. | EC277134          | 26.5 | 8.8 | 0.597 | 66.4 | 9.0 | 8.0 | 90.5 | 35.0 | 103.0 | 35.5 | 25.9 | 11.1 | 18.4 | 7.24 | 3.65 | 48.0 | 49.4 | 680.4 |
| 96. | CUO/79/<br>Pru11A | 29.0 | 9.5 | 0.600 | 63.7 | 9.0 | 7.5 | 93.0 | 33.0 | 112.2 | 42.3 | 38.3 | 12.9 | 20.2 | 7.32 | 3.68 | 52.1 | 42.3 | 741.0 |

---

**CC**-Chlorophyll content, **CTD**-Canopy temperature depression, **NDVI**-Normalized difference vegetative index, **MSI**-Membrane stability index, **PW**-Plant waxiness, **LR**-Leaf rolling, **DA**-Days to 50 % anthesis, **GFP**-Grain filling Period, **PH**-Plant height, **PL**-Peduncle length, **FLA**-Flag leaf area, **SL**-Spike length, **NSS**-Number of spikelets per spike, **GL**-Grain length, **GW**-Grain width, **TGW**-Thousand grain weight, **HI**-Harvest index, **GY**-Grain yield.
