# Supplementary material for: Identification of Climate-Smart Bread Wheat Germplasm Lines With Enhanced Adaptation to Global Warming
Source: Preprints.org preprint supplement (doi:10.20944/preprints202305.2192.v1), 2023-05-31
Supplement: Supplementary file 6 [file supplementary]

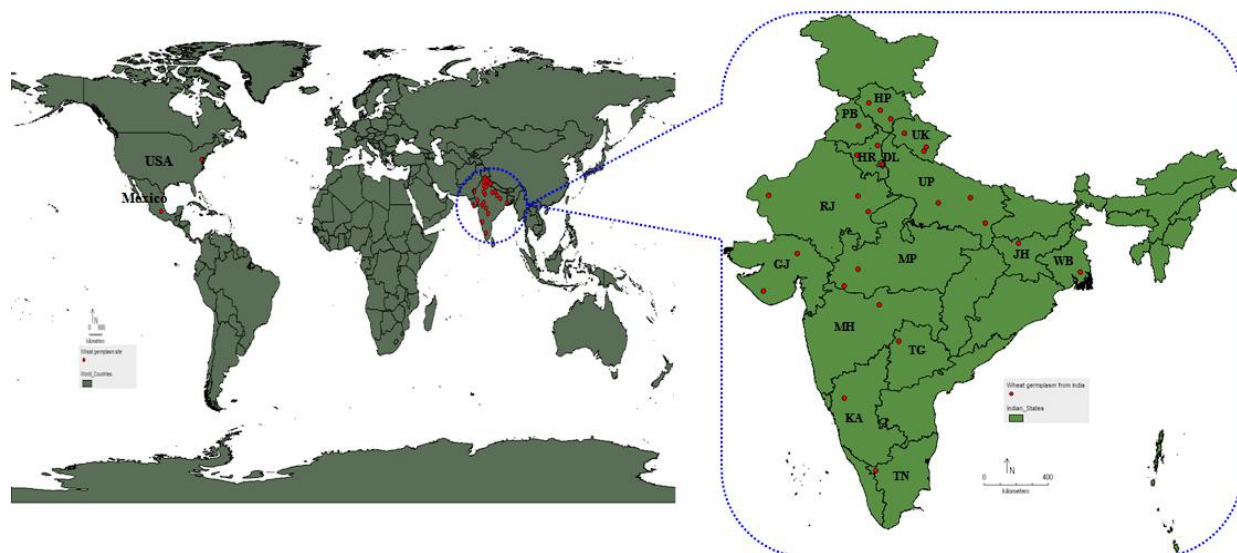

**Supplementary Figure S1** | Geo-referencing map of bread wheat accessions comprising of exotic (17) and indigenous (79) collections used in the screening for terminal heat-stress tolerance.

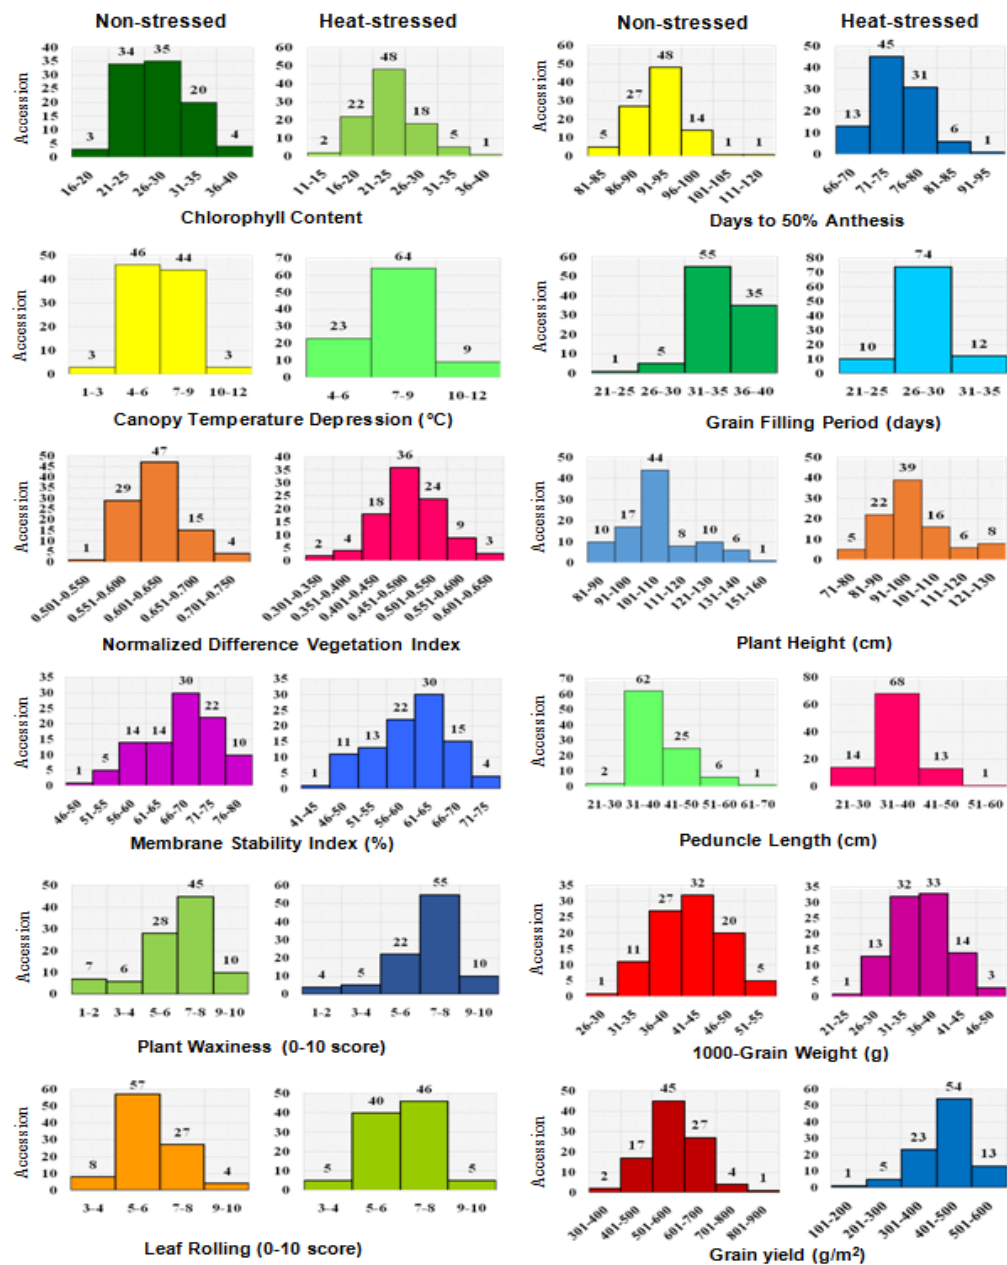

**Supplementary Figure S2** | Frequency distribution of 96 bread wheat accessions for 12 important morpho-physiological and yield contributing traits under non-stressed and heat-stressed environments.
