# Supplementary material for: Identification of Climate-Smart Bread Wheat Germplasm Lines With Enhanced Adaptation to Global Warming
Source: Preprints.org preprint supplement (doi:10.20944/preprints202305.2192.v1), 2023-05-31
Supplement: Supplementary file 8 [file supplementary]

**Supplementary Table S2** | ANOVA for combined ABD data from 18 morpho-physiological and yield contributing traits recorded in 96 accessions of bread wheat under non-stressed and heat-stressed environments during two crop seasons of years 2018-19 and 2019-20.

| Trait /<br>Source of variation →  | Non-stressed Environment |            |        |            | Heat-stressed Environment |            |         |           |
|-----------------------------------|--------------------------|------------|--------|------------|---------------------------|------------|---------|-----------|
|                                   | Year                     | Genotype   | G × Y  | Model      | Year                      | Genotype   | G × Y   | Model     |
| Degree of freedom                 | 1                        | 95         | 95     | 191        | 1                         | 95         | 95      | 191       |
| Chlorophyll Content               | 6.89                     | 39.67**    | 12.87  | 26.14**    | 0.53                      | 44.72**    | 1.26    | 22.92**   |
| CTD                               | 191.49**                 | 8.26       | 7.49   | 8.47       | 241.42**                  | 4.44       | 3.21    | 5.18      |
| NDVI                              | 0.144**                  | 0.003**    | 0.002* | 0.003**    | 0.187**                   | 0.008**    | 0.003** | 0.007**   |
| MSI (%)                           | 585.30**                 | 45.12      | 6.17   | 28.06      | 1016.06**                 | 93.24**    | 5.97    | 54.17**   |
| Plant Waxiness (0-10 scale)       | 8.53**                   | 8.03**     | 0.59   | 4.35**     | 0.01                      | 6.03**     | 0.06    | 3.03**    |
| Leaf Rolling (0-10 scale)         | 0.72                     | 3.57**     | 0.56   | 2.05**     | 0.03                      | 3.56**     | 0.17    | 1.86**    |
| Days to 50% Anthesis              | 320.25**                 | 51.69**    | 6.44   | 30.34**    | 277.15**                  | 35.72**    | 2.92    | 20.59**   |
| GFD (days)                        | 255.12**                 | 13.46**    | 2.90   | 9.92**     | 484.91**                  | 8.16**     | 2.26    | 8.02**    |
| Plant Height (cm)                 | 1252.37**                | 341.14**   | 32.67  | 193.41**   | 371.49**                  | 309.45**   | 24.63** | 168.12**  |
| Peduncle Length (cm)              | 26.89                    | 78.09**    | 7.25   | 42.68**    | 171.44**                  | 60.86**    | 8.66**  | 36.06**   |
| Flag Leaf Area (cm <sup>2</sup> ) | 749.86**                 | 157.87**   | 44.25  | 104.00**   | 1736.81**                 | 83.14**    | 22.88   | 61.59**   |
| Spike Length (cm)                 | 39.66**                  | 2.87**     | 0.50   | 1.97**     | 1.51*                     | 2.47**     | 0.67**  | 1.57**    |
| Spikelets per Spike               | 2.56                     | 4.52**     | 1.28   | 2.90**     | 0.56                      | 4.63**     | 0.96    | 2.78**    |
| Grain Length (mm)                 | 0.72**                   | 0.33**     | 0.03   | 0.18**     | 0.24**                    | 0.32**     | 0.03**  | 0.18**    |
| Grain Width (mm)                  | 3.56**                   | 0.08**     | 0.02   | 0.07**     | 3.31**                    | 0.07**     | 0.02    | 0.06**    |
| 1000-Grain Weight (g)             | 138.41**                 | 55.58**    | 11.32* | 33.70**    | 1395.47**                 | 46.04**    | 11.43   | 37.05**   |
| Harvest Index (%)                 | 1.91                     | 53.49**    | 21.30  | 37.20      | 33.56                     | 44.40**    | 20.05   | 32.36**   |
| Grain Yield per Plot (g)          | 2600.86                  | 36292.57** | 563.68 | 18341.37** | 6215.54                   | 27016.67** | 271.41  | 3598.04** |

\*\*, \* significant at 0.01 and 0.05 probability level, respectively.
