# Supplementary material for: Identification of Climate-Smart Bread Wheat Germplasm Lines With Enhanced Adaptation to Global Warming
Source: Preprints.org preprint supplement (doi:10.20944/preprints202305.2192.v1), 2023-05-31
Supplement: Supplementary file 9 [file supplementary]

Archive with 8 entries (8 files):
- Supplementary Table S2 Combined ANOVA.pdf
- Supplementary Table S3 Adjusted means Non-stressed.pdf
- Supplementary Table S4 Adjusted means_heat stressed.pdf
- Supplementary Table S6 Heat-stress tolerant and susceptible bread wheat accessions identified based on grain yield.pdf
- Supplementary Table S7 Promising accessions identified for different traits for NS and HS environments.pdf
- Supplementary Table S1 Accessions of wheat_Revised.pdf
- Supplementary Table S5 Mean performance and stability parameters of 96 bread wheat accessions for TGW and yield.pdf
- Supplementary Figure 1-2.pdf
